# Supplementary material for: Structures of active melanocortin-4 receptor–Gs-protein complexes with NDP-α-MSH and setmelanotide
Source: PubMed Central journal article supplement (PMC8563958; doi:10.1038/s41422-021-00569-8), 2021-09-24
Supplement: 41422_2021_569_MOESM7_ESM.pdf [file 41422_2021_569_MOESM7_ESM.pdf]

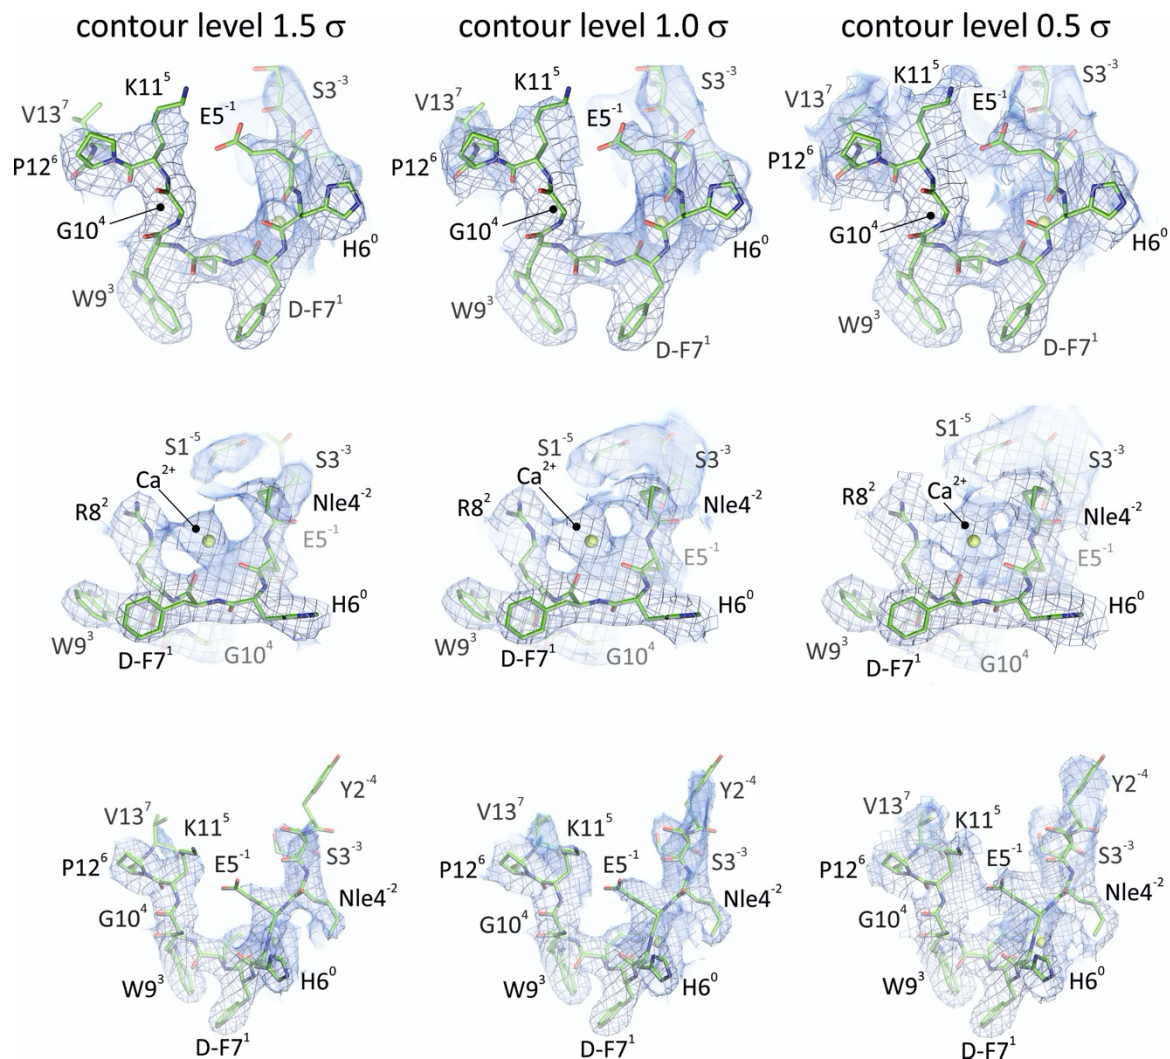

**Fig. S7: Quality of the cryo-EM density map of the NDP- $\alpha$ -MSH ligand in the NDP- $\alpha$ -MSH-MC4R-Gs-Nb35 complex.** Three different views (top to bottom) on the NDP- $\alpha$ -MSH ligand (green color) together with the coordinating calcium ion (lemon green color). All figures show cryo-EM densities of the ligand (light blue colored mesh/volume) contoured at three different contour levels (1.5 (left), 1.0 (middle) and 0.5  $\sigma$  (right)). NDP- $\alpha$ -MSH is depicted as sticks and the calcium ion as sphere representation.
