# Supplementary material for: Structures of active melanocortin-4 receptor–Gs-protein complexes with NDP-α-MSH and setmelanotide
Source: PubMed Central journal article supplement (PMC8563958; doi:10.1038/s41422-021-00569-8), 2021-09-24
Supplement: 41422_2021_569_MOESM8_ESM.pdf [file 41422_2021_569_MOESM8_ESM.pdf]

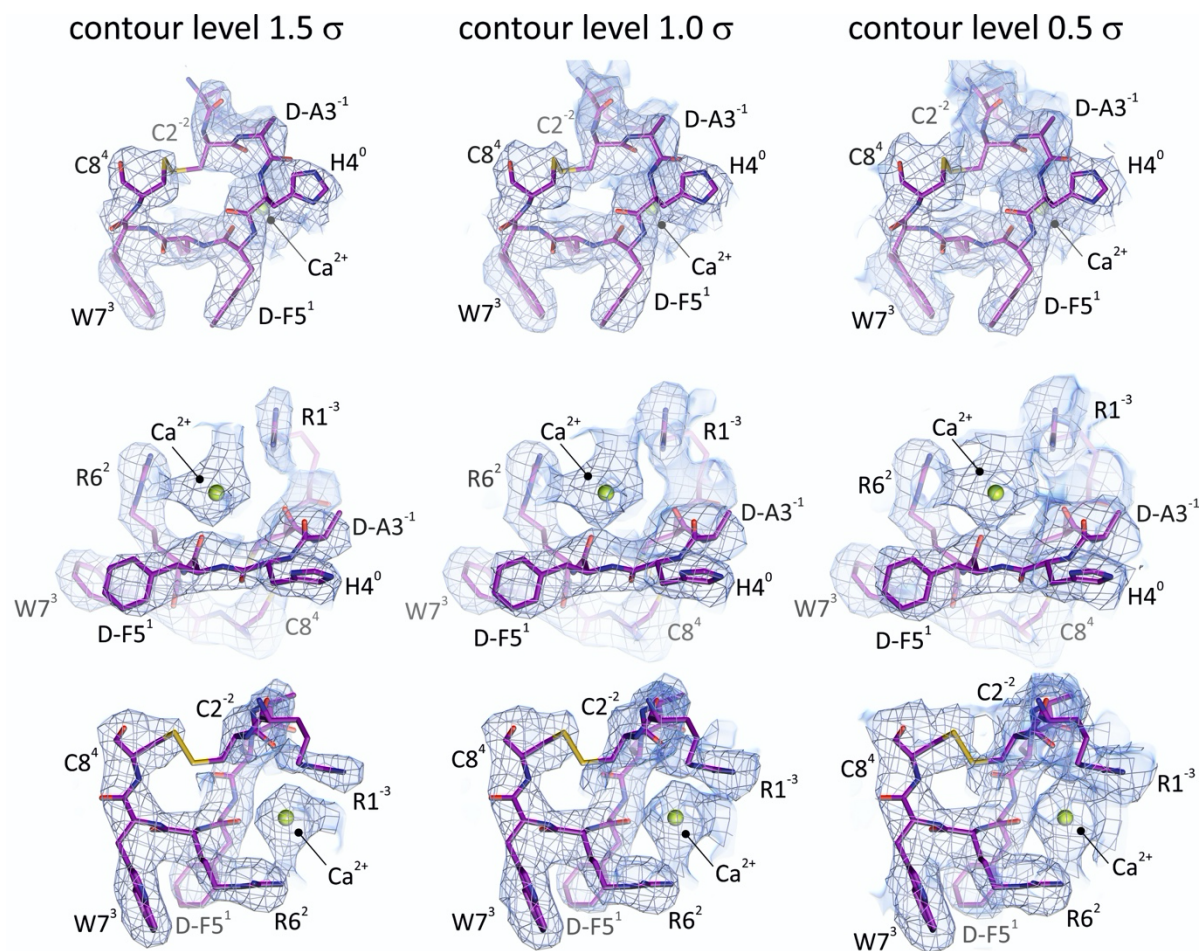

**Fig. S8: Quality of the cryo-EM density map of setmelanotide in the setmelanotide-MC4R-Gs-Nb35 complex.** Three different views (top to bottom) on the setmelanotide ligand (purple color) and the binding calcium ion (lemon green color). All figures show the cryo-EM densities of the ligand (light blue colored mesh/volume) contoured at three different contour levels (1.5 (left), 1.0 (middle) and 0.5  $\sigma$  (right)). Setmelanotide is depicted as sticks and the calcium ion as sphere representation.
