# Supplementary material for: Structures of active melanocortin-4 receptor–Gs-protein complexes with NDP-α-MSH and setmelanotide
Source: PubMed Central journal article supplement (PMC8563958; doi:10.1038/s41422-021-00569-8), 2021-09-24
Supplement: 41422_2021_569_MOESM9_ESM.pdf [file 41422_2021_569_MOESM9_ESM.pdf]

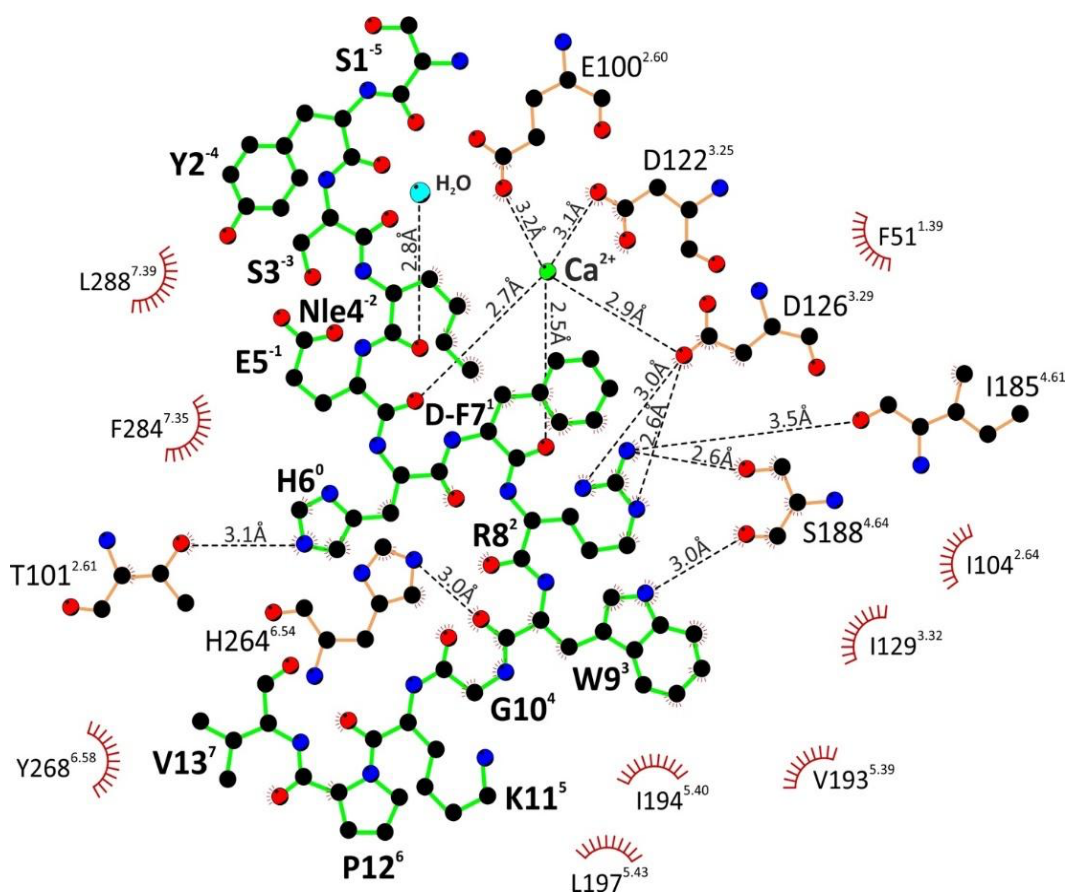

**Fig. S9: Interactions between the agonist NDP- $\alpha$ -MSH and the MC4R.** Potential hydrogen bonds and hydrophobic interactions were analyzed using HBPLUS<sup>1</sup> with a maximum donor acceptor distance of 3.5 Å as implemented in the program LigPlot+ v.2.1<sup>2</sup>, which was used to draw this schematic view. Potential hydrogen bonds are indicated by black dashed lines and distance labels. Residues with closest distances of less than 3.9 Å are considered to be in van der Waals contact. These residues are shown as dashed, red segments of a circle. Water molecules (cyan color) and the calcium ion (green color) are depicted as spheres, respectively.
