# Supplementary material for: Structures of active melanocortin-4 receptor–Gs-protein complexes with NDP-α-MSH and setmelanotide
Source: PubMed Central journal article supplement (PMC8563958; doi:10.1038/s41422-021-00569-8), 2021-09-24
Supplement: 41422_2021_569_MOESM12_ESM.pdf [file 41422_2021_569_MOESM12_ESM.pdf]

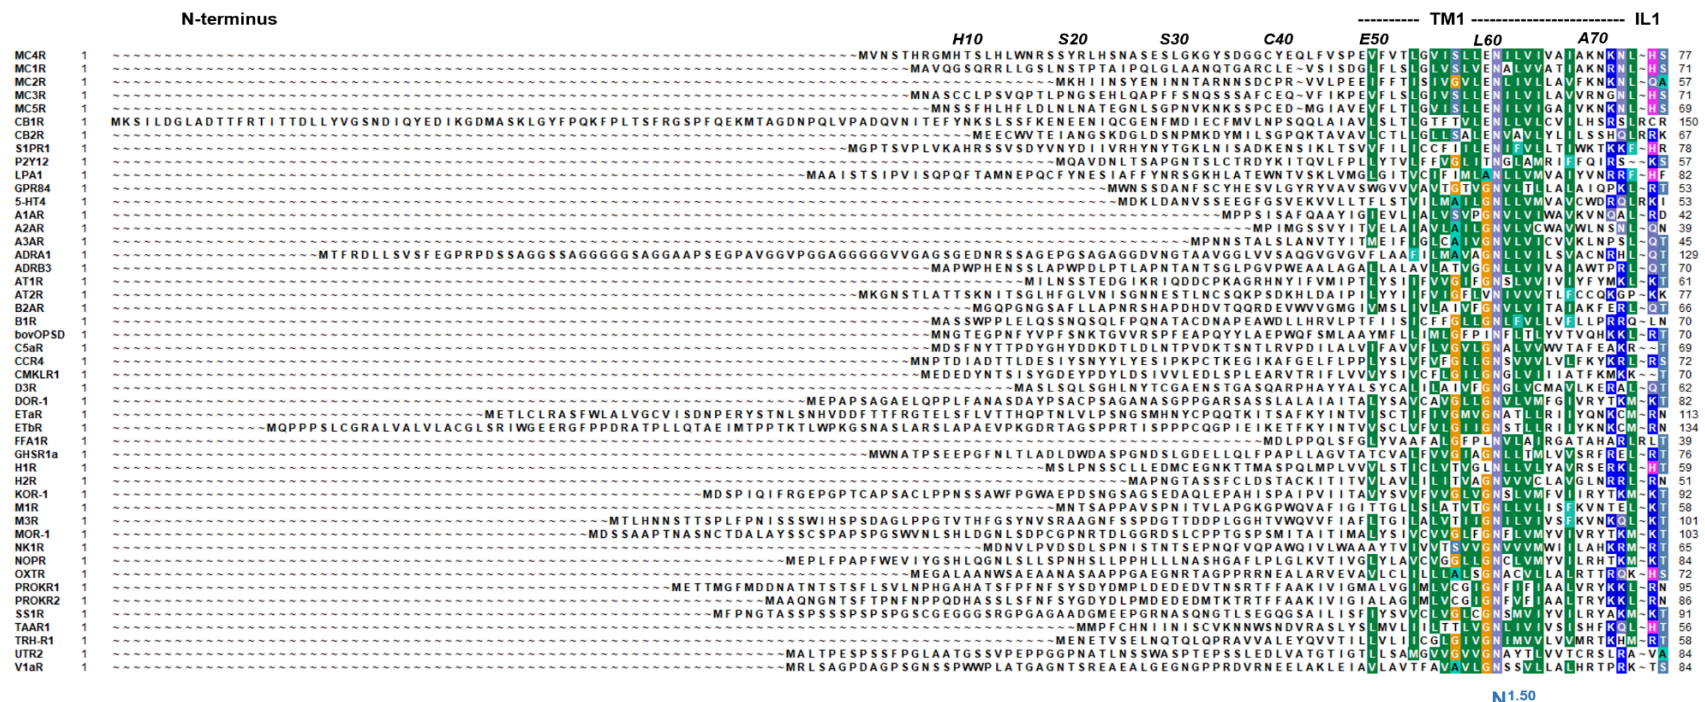

**Fig. S12a-e: Sequence alignment of 47 human class A GPCR.** Highly conserved positions according to the unifying *Ballesteros and Weinstein* numbering scheme<sup>4</sup> are indicated by respective numbers below the alignment. The structural dimensions of each MC4R transmembrane helix (TM) or inter-connecting loops (IL = intracellular loop; EL = extracellular loop) are indicated above the sequences, as well as numbers for the MC4R sequence. The alignment was visualized using the software BioEdit<sup>5</sup>. Specific background colors indicating conservation (Blossum62 matrix) and reflecting chemical properties of the amino acid side chains: black, proline; blue, positively charged; cyan/green, aromatic and hydrophobic; green, hydrophobic; red, negatively charged; gray, hydrophilic; dark red, cysteines; and magenta, histidine.

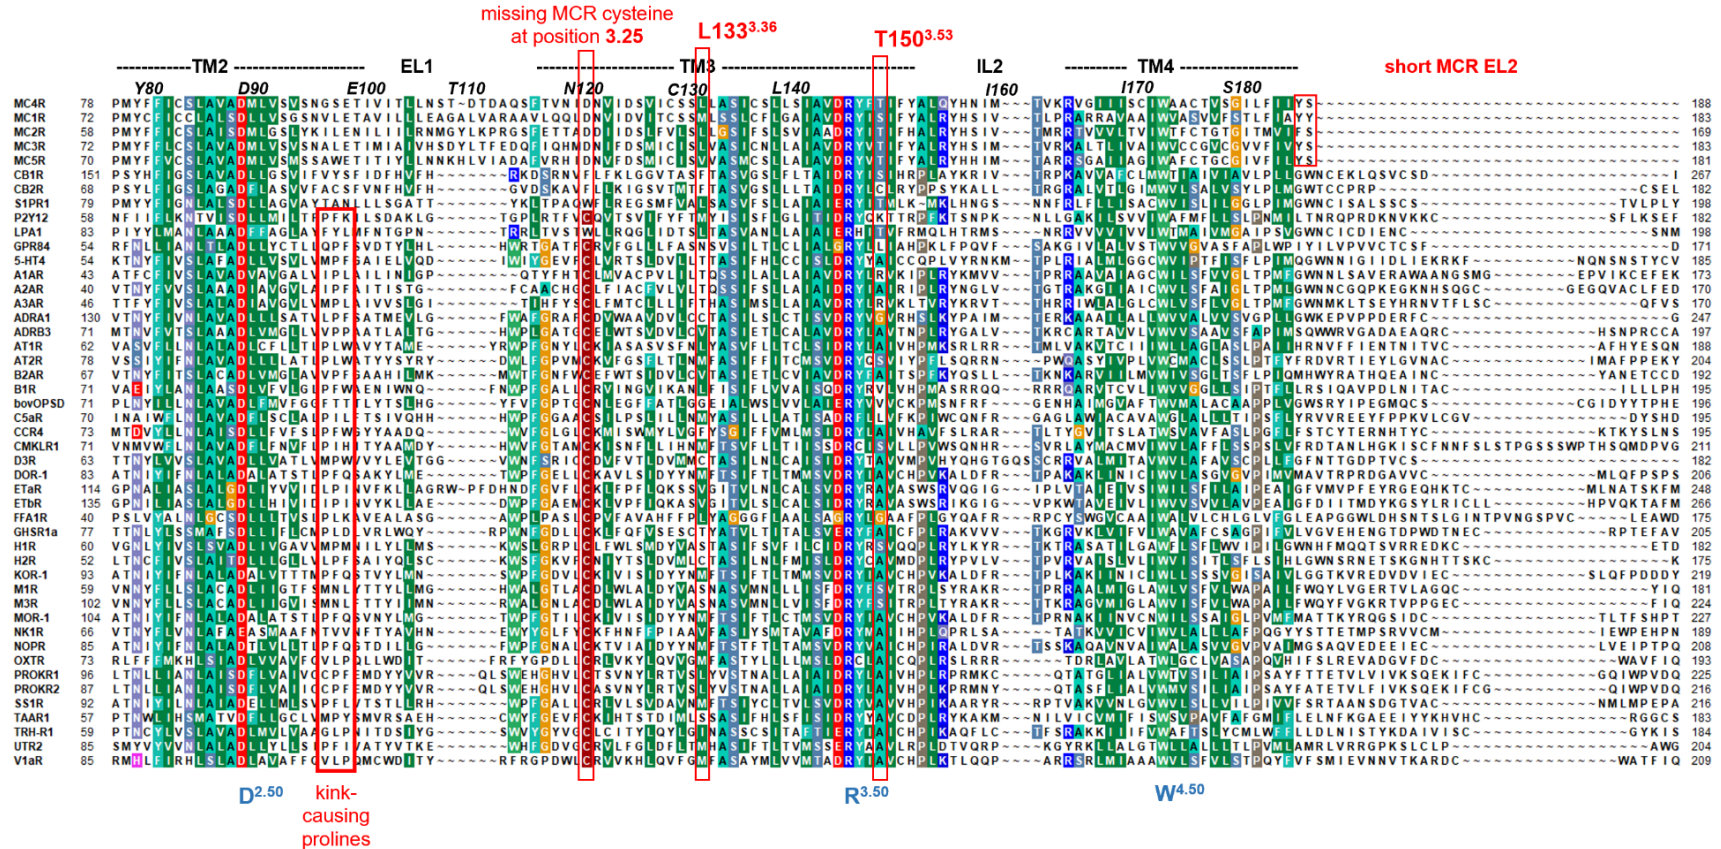

Fig. S12b

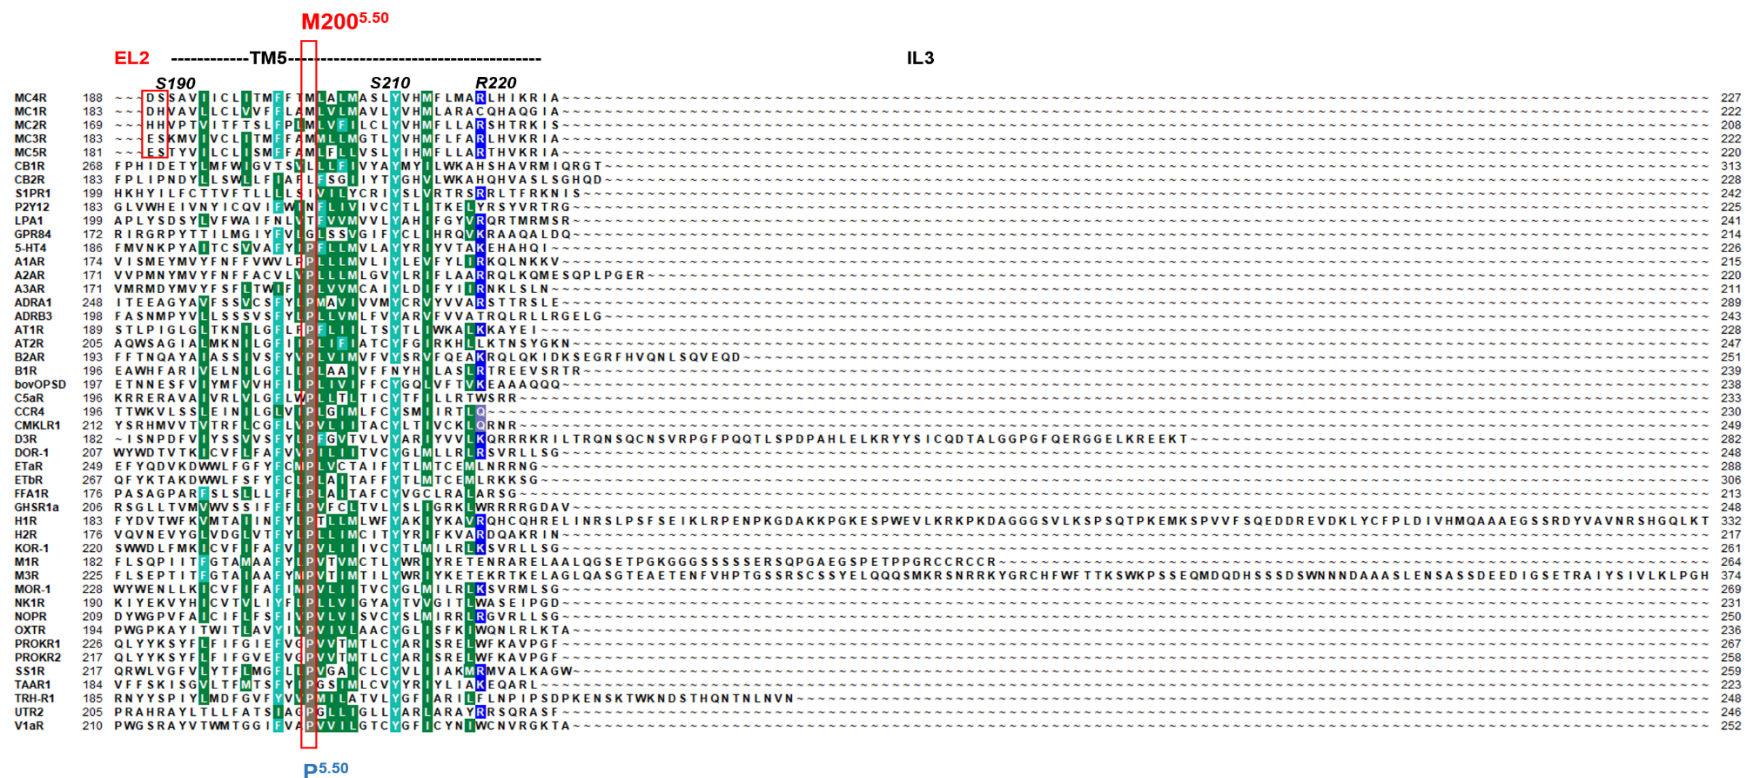

Fig. S12c

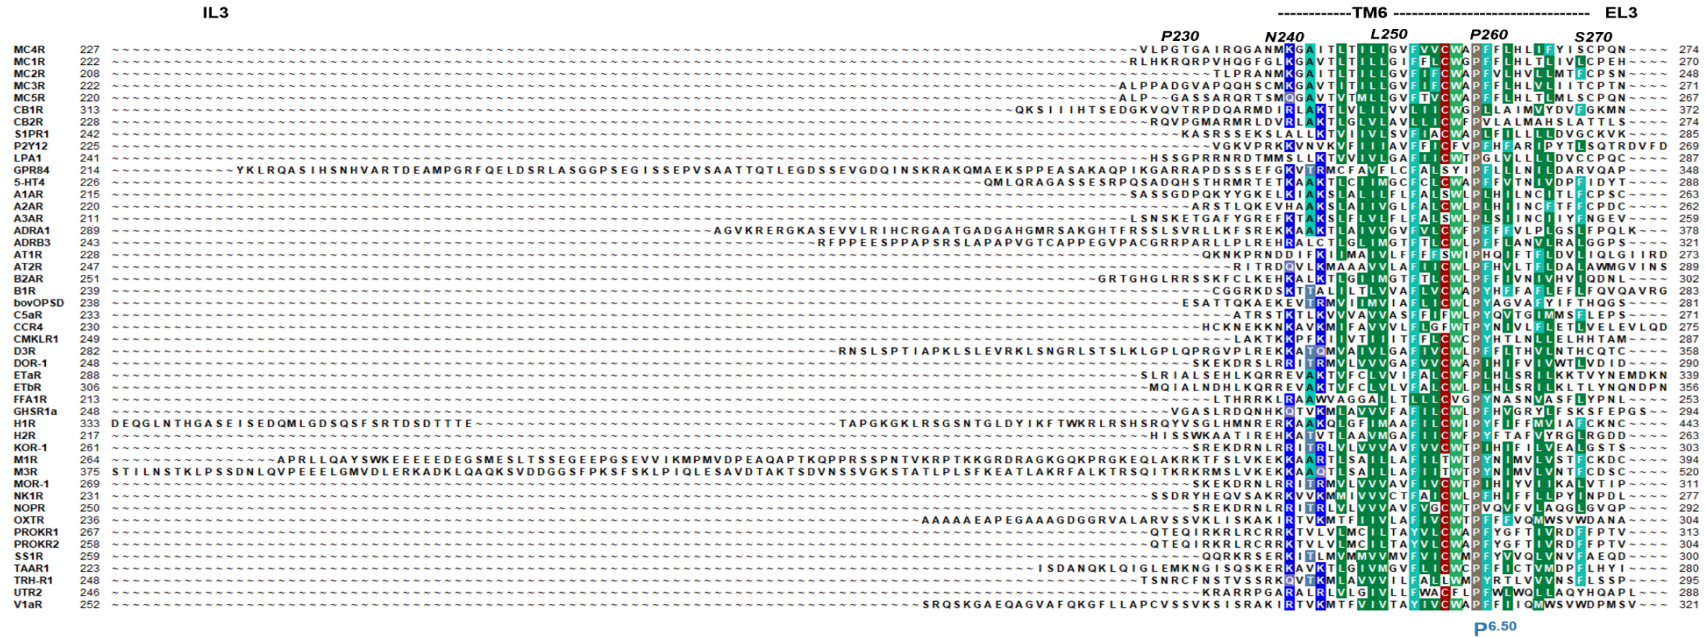

Fig. S12d

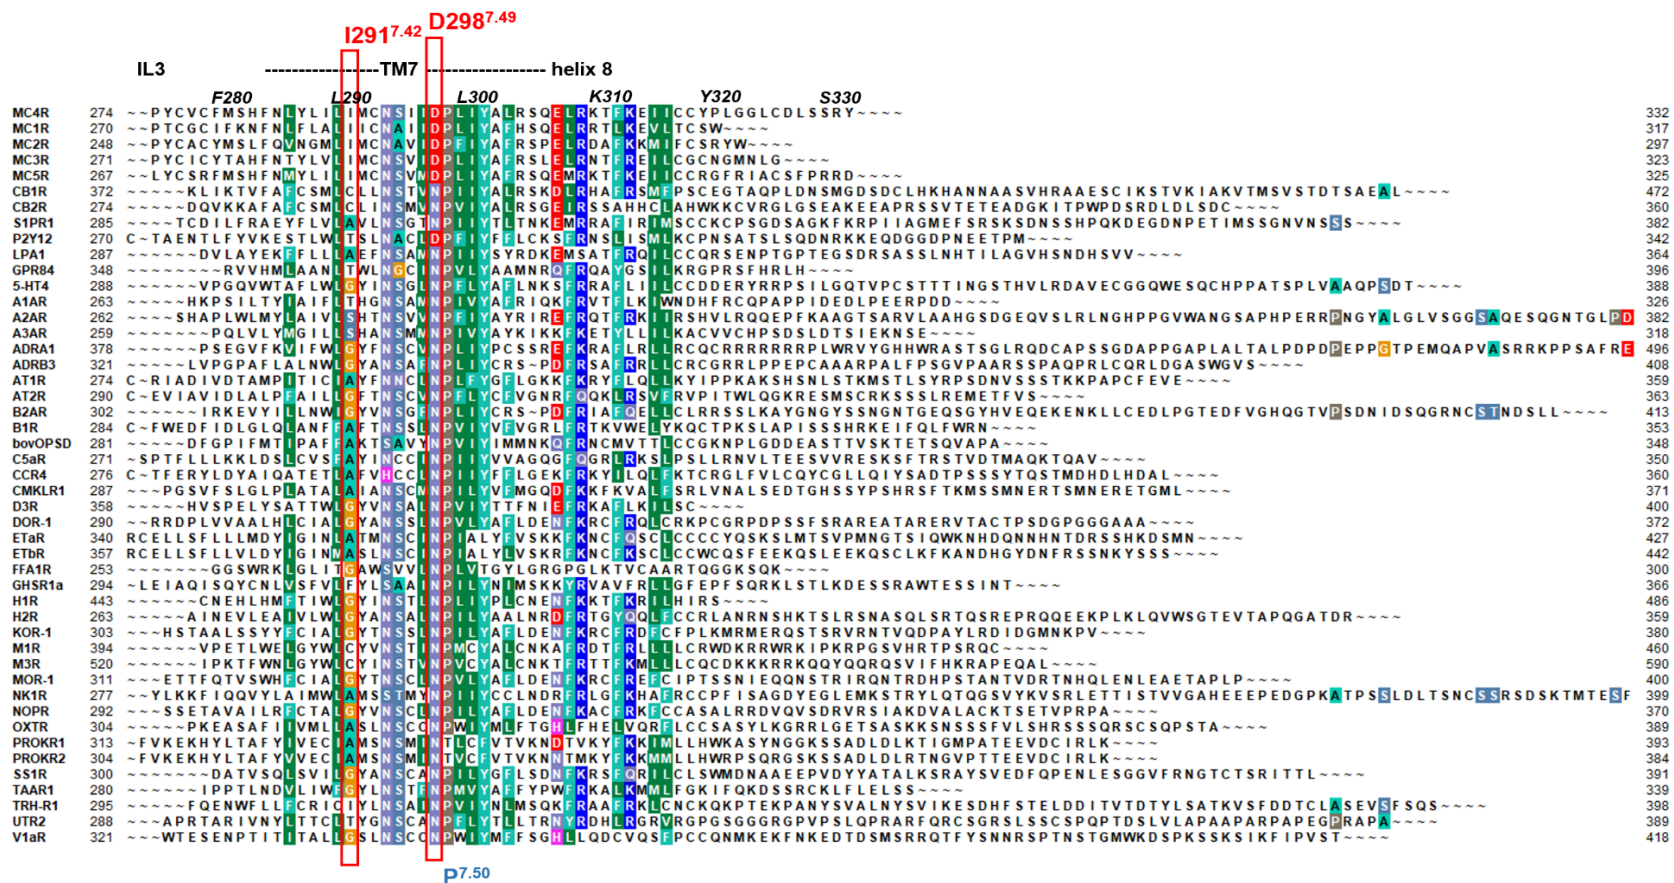

Fig. S12e
