# Supplementary material for: Structures of active melanocortin-4 receptor–Gs-protein complexes with NDP-α-MSH and setmelanotide
Source: PubMed Central journal article supplement (PMC8563958; doi:10.1038/s41422-021-00569-8), 2021-09-24
Supplement: 41422_2021_569_MOESM13_ESM.pdf [file 41422_2021_569_MOESM13_ESM.pdf]

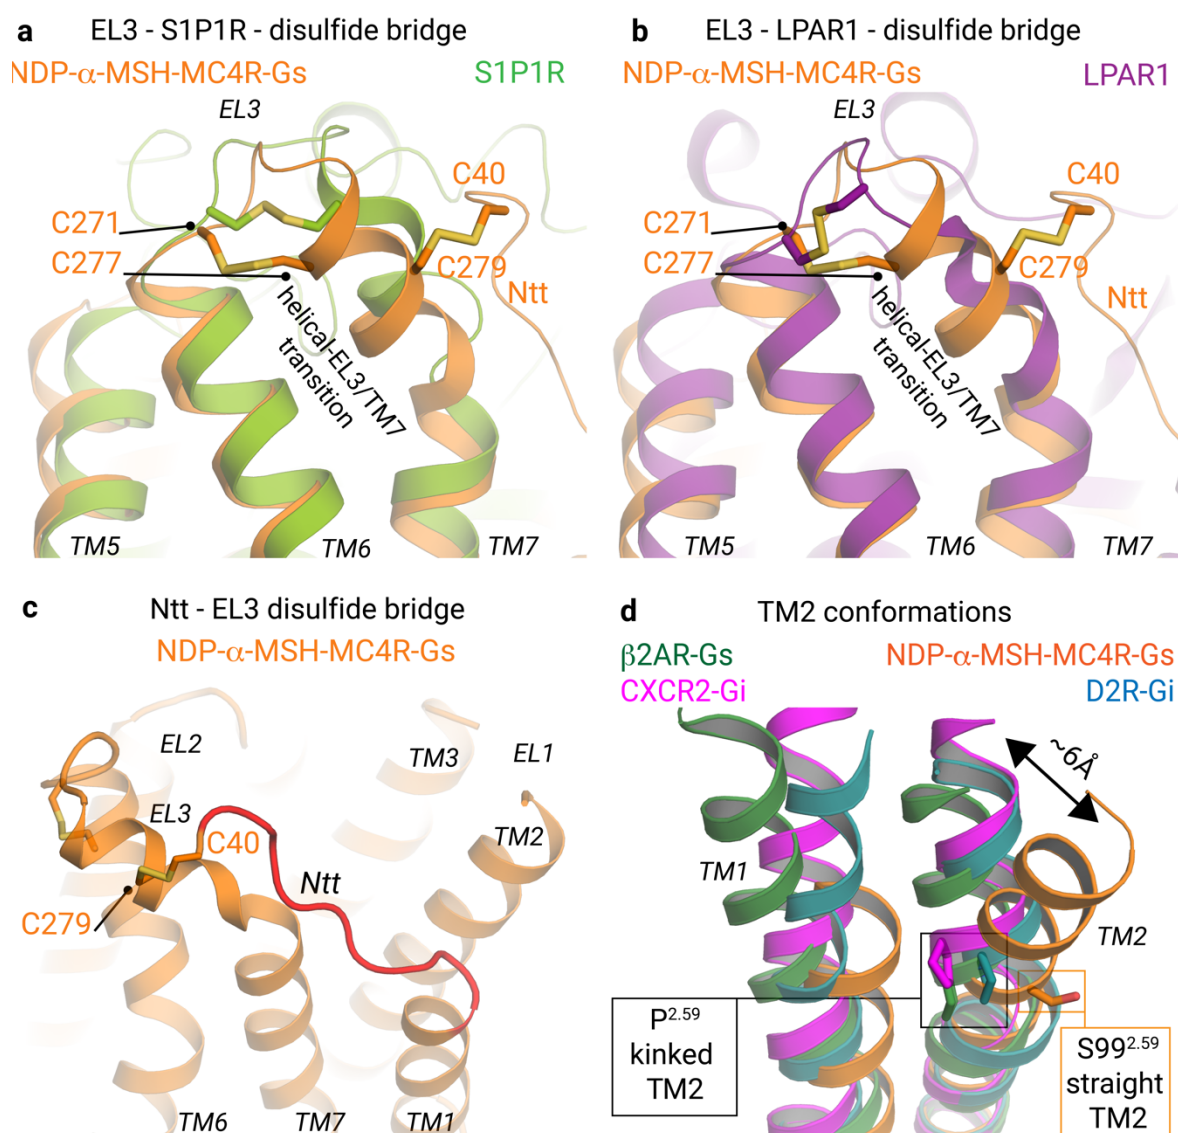

**Fig. S13: Specificities of the MC4R in the extracellular region.**

The active state MC4R structure (orange color) shares with

(a) the sphingosine 1-phosphate receptor 1 (S1P1R, light green color, PDB ID: 3v2y<sup>6</sup>) and (b) the lysophosphatidic acid receptor 1 (LPAR1, deep purple color, PDB ID: 4z34<sup>7</sup>) a disulfide bridge in the EL3, which is involved in forming a specific conformation including a helical transition to TM7.

(c) The MC4R has a second disulfide bridge between EL3 and the receptor N-terminus (Ntt) that constraints the extracellular helix close to TM7 and by this participates in forming the large peptide ligand-binding region.

(d) Contrary to most other class A GPCRs, MCRs have no proline in TM2 (Fig. S12b) which usually causes a kink bulge and slight rotation of TM2 toward the extracellular region. The superposition of the MC4R structure in the active state with various already determined GPCR structures ( $\beta$ 2AR, forest green color, PDB ID: 3sn6<sup>8</sup>; D2R, blue color, PDB ID: 6vms<sup>9</sup>; CXCR2, magenta color, PDB ID: 6lfo<sup>10</sup>) illustrates the difference in spatial TM2 allocation (5.9 Å distance measured between position 2.65 in MC4R and  $\beta$ 2AR).
