# Supplementary material for: Structures of active melanocortin-4 receptor–Gs-protein complexes with NDP-α-MSH and setmelanotide
Source: PubMed Central journal article supplement (PMC8563958; doi:10.1038/s41422-021-00569-8), 2021-09-24
Supplement: 41422_2021_569_MOESM14_ESM.pdf [file 41422_2021_569_MOESM14_ESM.pdf]

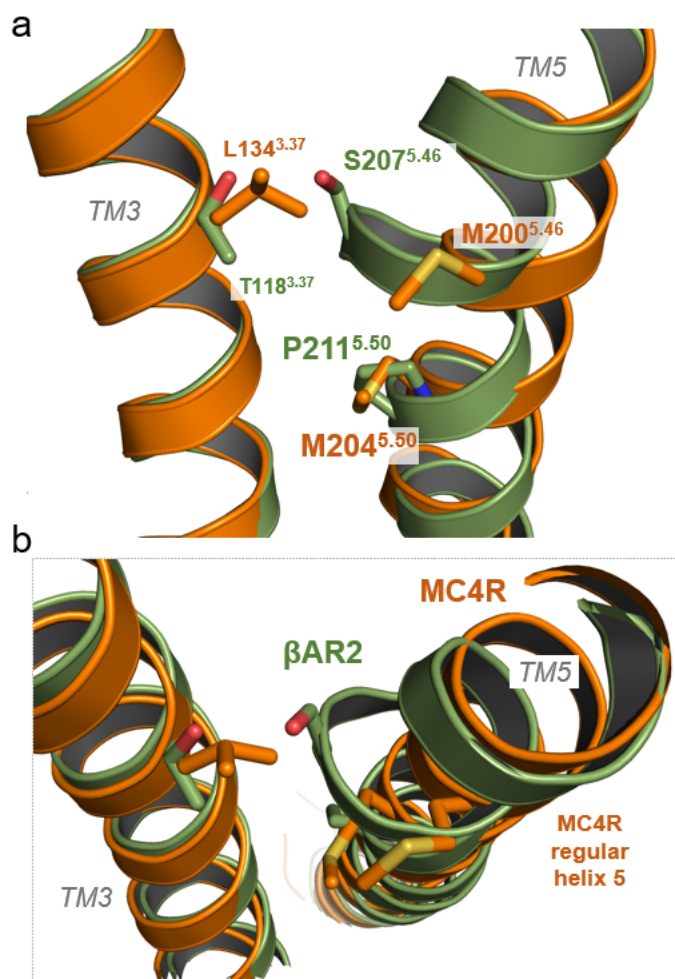

**Fig. S14: Straight MC4R helix 5 conformation without a proline induced kink and bulge.**

(a) Comparison between MC4R (orange) and the  $\beta$ 2AR (green, PDB ID: 3sn6<sup>8</sup>) structures reveal differences in the TM5 helix conformation. Caused by a highly conserved proline in class A GPCRs (Fig. S12c) TM5 is usually kinked as observed also in the  $\beta$ 2AR. In consequence, amino acids at the proline induced kink-bulge pointing to the ligand binding region and forming a specific interface with TM3. S207<sup>5.46</sup> in the bulge of the  $\beta$ 2AR–TM5 is known to interact with ligands and is important for agonistic versus antagonistic effects. This structural helix-specificity is different in MC4R because of a methionine at position 5.50 instead of a proline. The helix is, therefore, without any bulge or kink. This contributes to forming a more distant interface to TM3,

(b) but also corresponding amino acids are located at spatially distinct positions compared to other class A GPCRs, e.g. position 5.46 (a).
