# Supplementary material for: Structures of active melanocortin-4 receptor–Gs-protein complexes with NDP-α-MSH and setmelanotide
Source: PubMed Central journal article supplement (PMC8563958; doi:10.1038/s41422-021-00569-8), 2021-09-24
Supplement: 41422_2021_569_MOESM15_ESM.pdf [file 41422_2021_569_MOESM15_ESM.pdf]

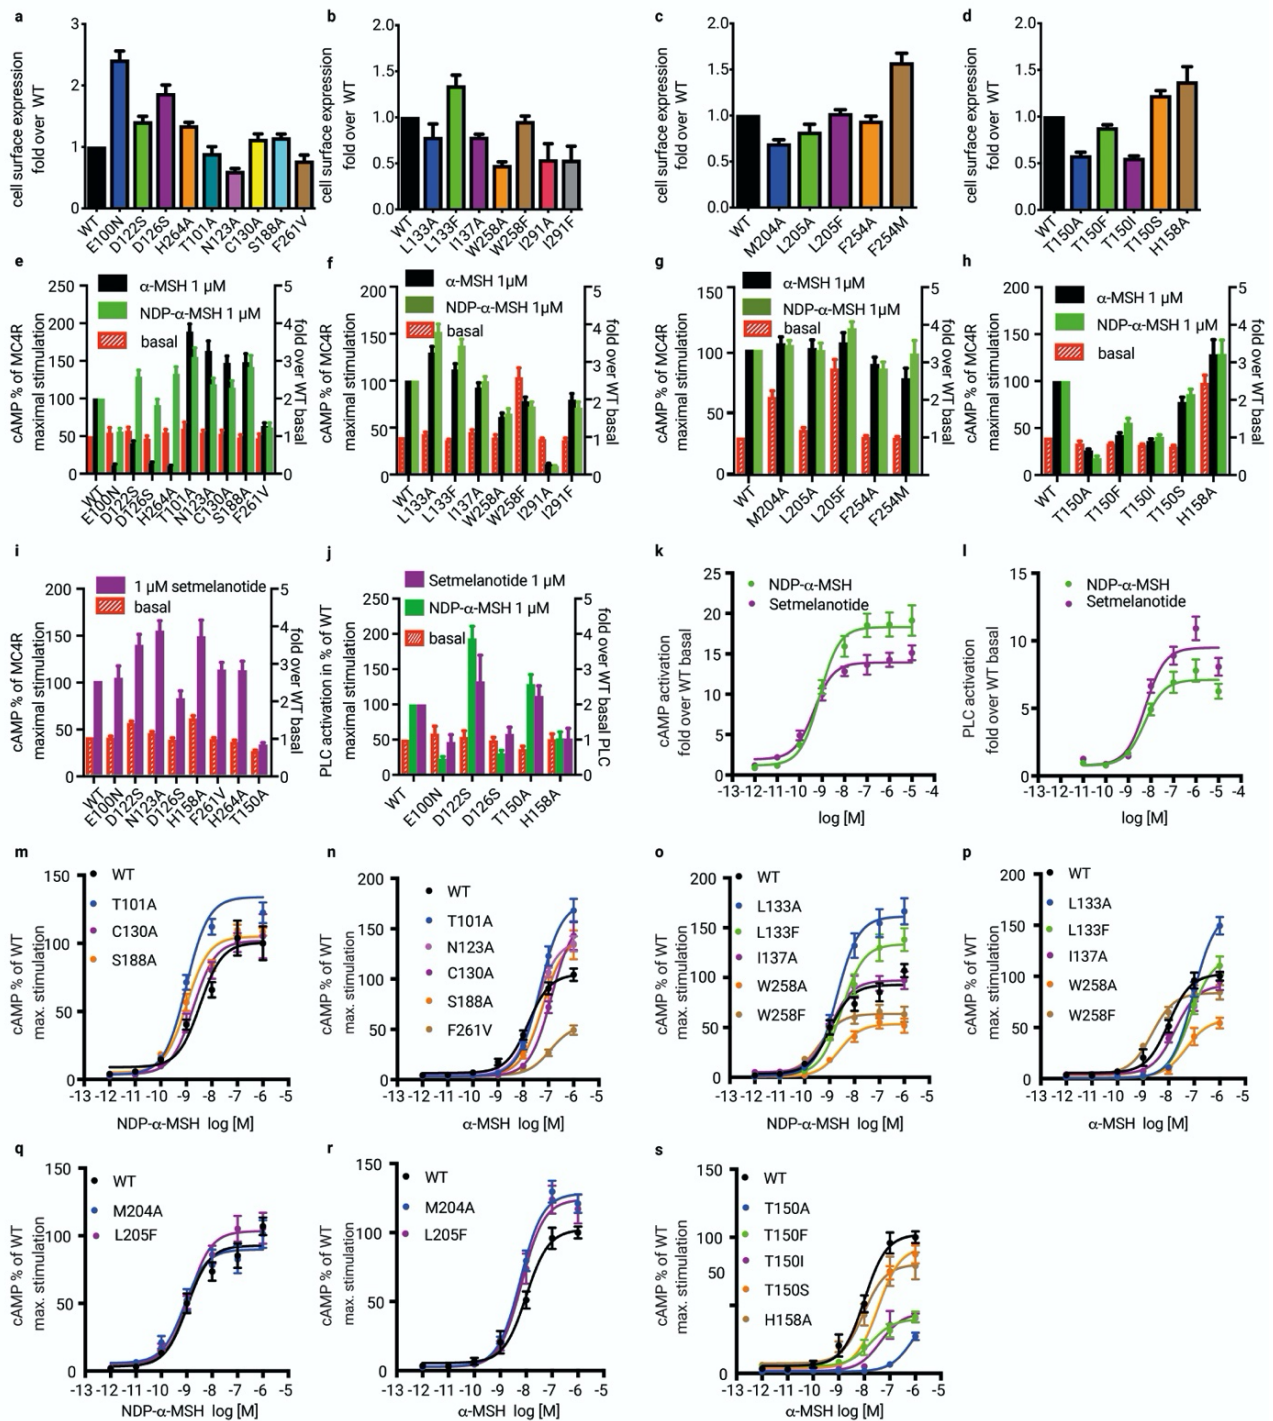

**Fig. S15: Functional data of MC4R variants.**

(a-d) Cell surface expression of wild-type MC4R (WT) and mutants shown as fold over WT. (e-h) Maximal Gs-protein signaling determined as cAMP accumulation of MC4R WT and mutants after addition of 1  $\mu$ M  $\alpha$ -MSH or NDP- $\alpha$ -MSH indicated as fold of MC4R WT max. signaling [%] (left y-axis). Basal cAMP accumulation of MC4R WT and mutants are depicted as fold over WT basal (right y-axis). (i) Maximal Gs-protein signaling determined as cAMP accumulation of MC4R WT and mutants after addition of 1  $\mu$ M setmelanotide indicated as fold of MC4R WT max. signaling [%] (left y-axis). Basal cAMP accumulation of MC4R WT and mutants are depicted as fold over WT basal (right y-axis).

**(j)** Maximal Gq/11-protein signaling determined by NFAT reporter gene assay (downstream transducer of PLC) of MC4R WT and mutants after addition of 1  $\mu$ M setmelanotide or NDP- $\alpha$ -MSH indicated as fold of MC4R WT max. signaling [%] (left y-axis). Basal PLC activation of MC4R WT and mutants are depicted as fold over WT basal (right y-axis).

**(k-l)** Concentration-response curves of **(k)** Gs-protein signaling determined as cAMP accumulation and **(l)** Gq/11 signaling determined by the activation of PLC of MC4R WT upon setmelanotide and NDP- $\alpha$ -MSH stimulation. Data is plotted as fold over WT basal.

**(m-s)** Concentration-response curves of Gs-protein signaling determined as cAMP accumulation of WT and indicated mutants after addition of  $\alpha$ -MSH and NDP- $\alpha$ -MSH shown as fold of MC4R WT max. signaling [%]. Cell surface expression data,  $E_{MAX}$  and  $EC_{50}$  values are summarized in Tables S7-S9.
