# Supplementary material for: Structures of active melanocortin-4 receptor–Gs-protein complexes with NDP-α-MSH and setmelanotide
Source: PubMed Central journal article supplement (PMC8563958; doi:10.1038/s41422-021-00569-8), 2021-09-24
Supplement: 41422_2021_569_MOESM16_ESM.pdf [file 41422_2021_569_MOESM16_ESM.pdf]

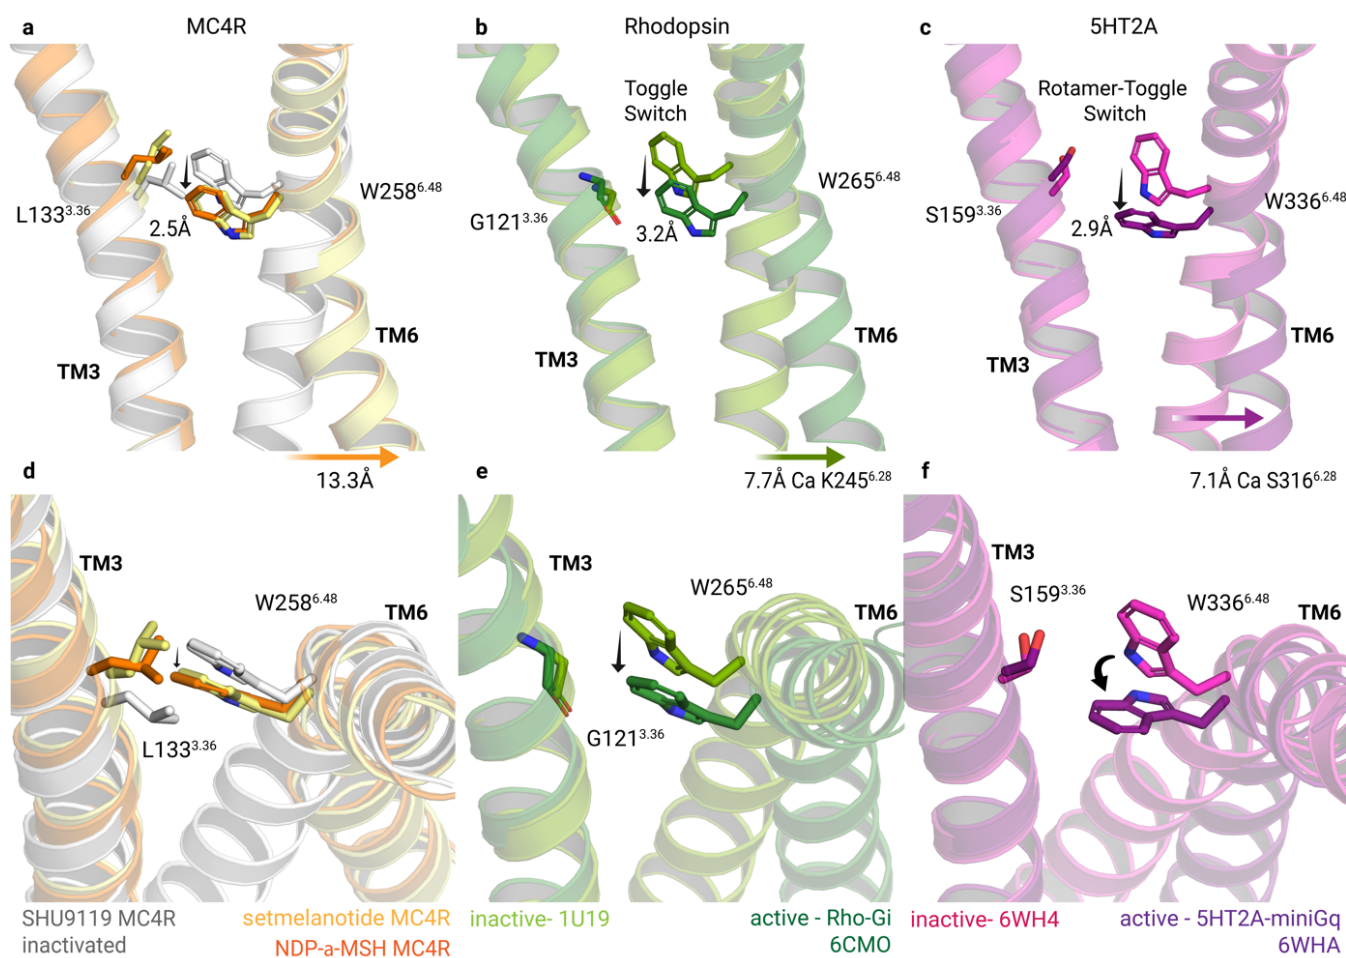

**Fig. S16: Localization of  $W^{6.48}$  in different active states of various class A GPCRs.**

Visualization of distance differences between inactive and active state conformations of  $W^{6.48}$  in

(a) MC4R,

(b) bovine rhodopsin (PDB IDs: inactive- 1u19<sup>11</sup>, active- 6cmo<sup>12</sup>), and

(c) 5-HT<sub>2A</sub>-receptor (5HT2A) (PDB IDs: inactive- 6wh4, active- 6wha<sup>13</sup>). The distances are associated with receptor activation (toggle switch model), thereby the tryptophan undergoes a vertical-lateral shift (measured at NE1 of Trp). In the 5HT2A structure the tryptophan side chain undergoes additional strong rotation. The associated TM6 outward movements are measured at C $\alpha$  positions of intracellularly located (a) M241<sup>6.31</sup>, (b) K245<sup>6.28</sup>, (c) S316<sup>6.28</sup>, and reflects the largest spatial difference of TM6 between respective active states.

(d-f) Visualization of the horizontal  $W^{6.48}$  shift from the top-view. The amino acid position 3.36 at TM3 in opposite to position 6.48 is different between all three receptors. However, in MC4R the L133<sup>3.36</sup> with a large hydrophobic side chain has a direct impact on  $W^{6.48}$ . In the SHU9119 antagonized MC4R structure<sup>3</sup> this leucine inhibits an activation related shift of TM6 at position  $W^{6.48}$ .
