# Supplementary material for: Structures of active melanocortin-4 receptor–Gs-protein complexes with NDP-α-MSH and setmelanotide
Source: PubMed Central journal article supplement (PMC8563958; doi:10.1038/s41422-021-00569-8), 2021-09-24
Supplement: 41422_2021_569_MOESM17_ESM.pdf [file 41422_2021_569_MOESM17_ESM.pdf]

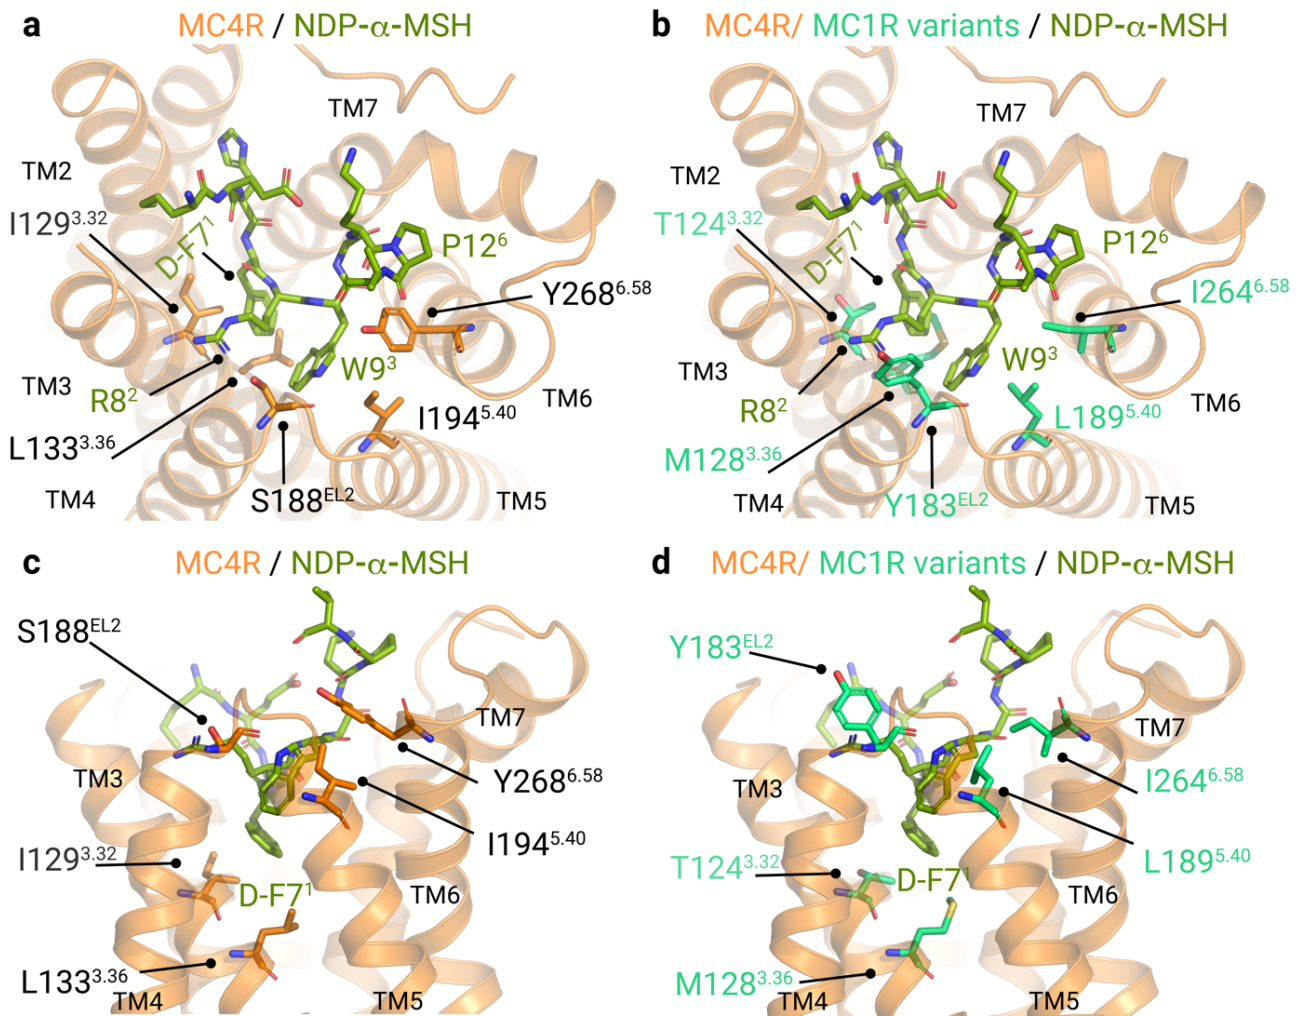

**Fig. S17: MC1R amino acid differences in the extended ligand binding pocket based on the NDP- $\alpha$ -MSH–MC4R–Gs–Nb35 complex structure.** Variations of MC1R compared to MC4R forming the NDP- $\alpha$ -MSH binding site were *in silico* substituted at the NDP- $\alpha$ -MSH–MC4R–Gs–Nb35 complex structure.

Ribbon representations, top-view (a-b) and side view

(c-d) of the ligand binding pocket of NDP- $\alpha$ -MSH (green color) bound to MC4R (orange color) with stick representation of amino acid residues I129<sup>3.32</sup>, L133<sup>3.36</sup>, S188<sup>EL2</sup>, I194<sup>5.40</sup> and Y268<sup>6.58</sup>, which are different between MC4R and MC1R.

In (b,d) aforementioned residues were substituted with the corresponding residues at MC1R (green/cyan color), namely, T124<sup>3.32</sup>, M128<sup>3.36</sup>, Y183<sup>EL2</sup>, L189<sup>5.40</sup> and I264<sup>6.58</sup>. Of note, S188<sup>EL2</sup> in MC4R EL2 corresponds to Y183<sup>EL2</sup> in MC1R. The backbone carbonyl group of MC4R S188<sup>EL2</sup> interacts with the W9<sup>3</sup> and the side chain hydroxyl group of S188<sup>EL2</sup> with R8<sup>2</sup> of the agonist NDP- $\alpha$ -MSH.
