# Supplementary material for: Structures of active melanocortin-4 receptor–Gs-protein complexes with NDP-α-MSH and setmelanotide
Source: PubMed Central journal article supplement (PMC8563958; doi:10.1038/s41422-021-00569-8), 2021-09-24
Supplement: 41422_2021_569_MOESM18_ESM.pdf [file 41422_2021_569_MOESM18_ESM.pdf]

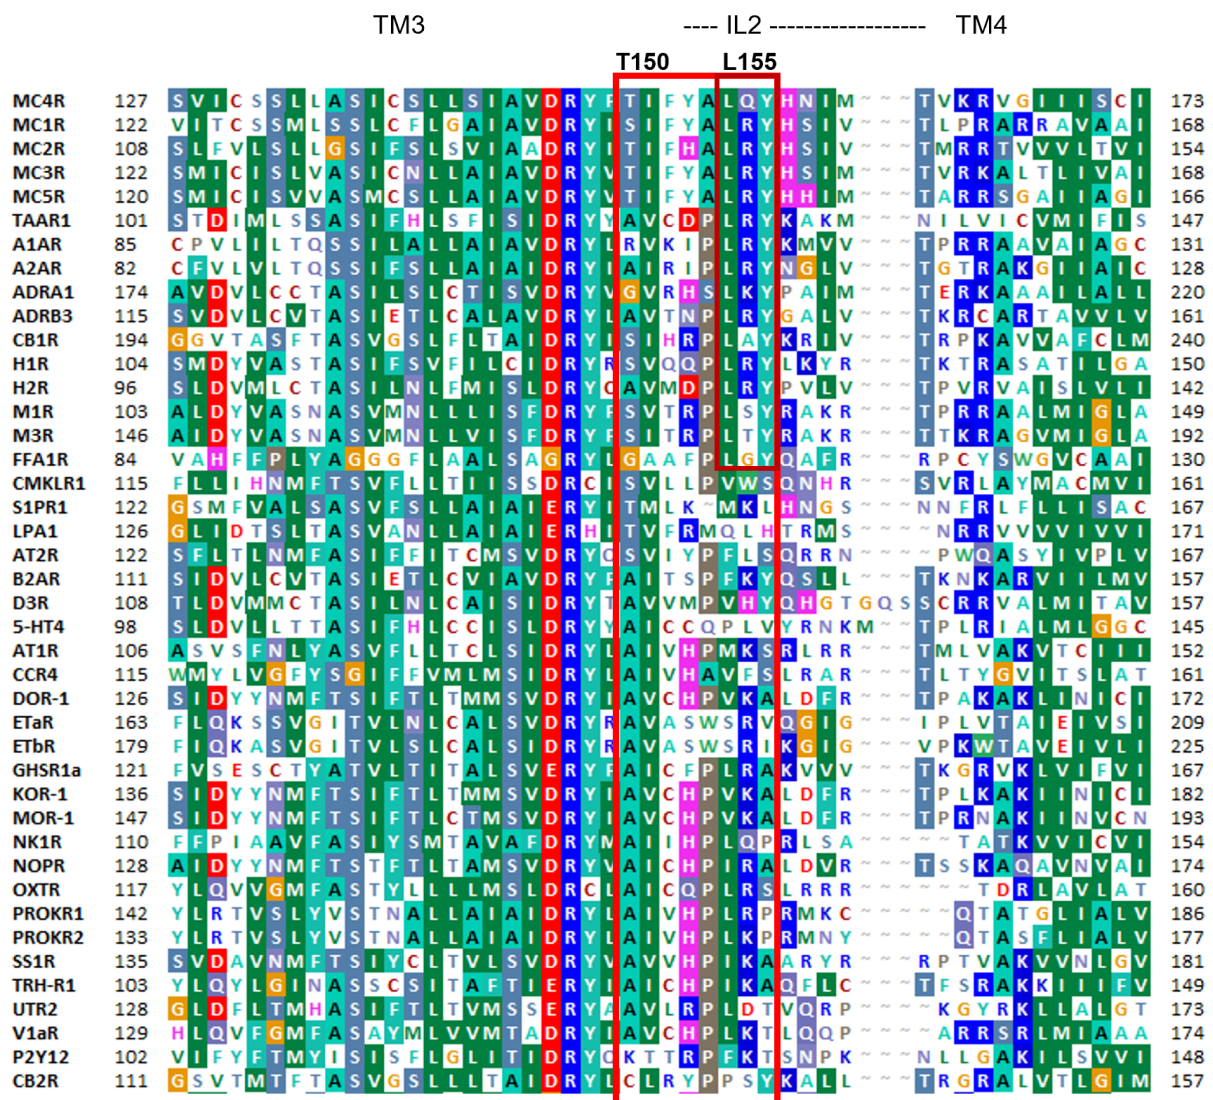

**Fig. S18: Intracellular loop two (IL2) amino acids in various class A GPCRs.** The structural dimension of the MC4R IL2 is indicated above respective sequence, as well as the in the main text discussed specific residues T150<sup>3,53</sup> (TM3) and L155<sup>IL2</sup>. The alignment was visualized using the software BioEdit (4). Background colors indicating conservation (Blossum62 matrix) among different receptors and reflecting chemical properties of the amino acid side chains: black - proline; blue - positively charged; cyan/green - aromatic and hydrophobic; green - hydrophobic; red - negatively charged; gray - hydrophilic; dark red - cysteines; and magenta - histidine.
