# Supplementary material for: Structures of active melanocortin-4 receptor–Gs-protein complexes with NDP-α-MSH and setmelanotide
Source: PubMed Central journal article supplement (PMC8563958; doi:10.1038/s41422-021-00569-8), 2021-09-24
Supplement: 41422_2021_569_MOESM22_ESM.pdf [file 41422_2021_569_MOESM22_ESM.pdf]

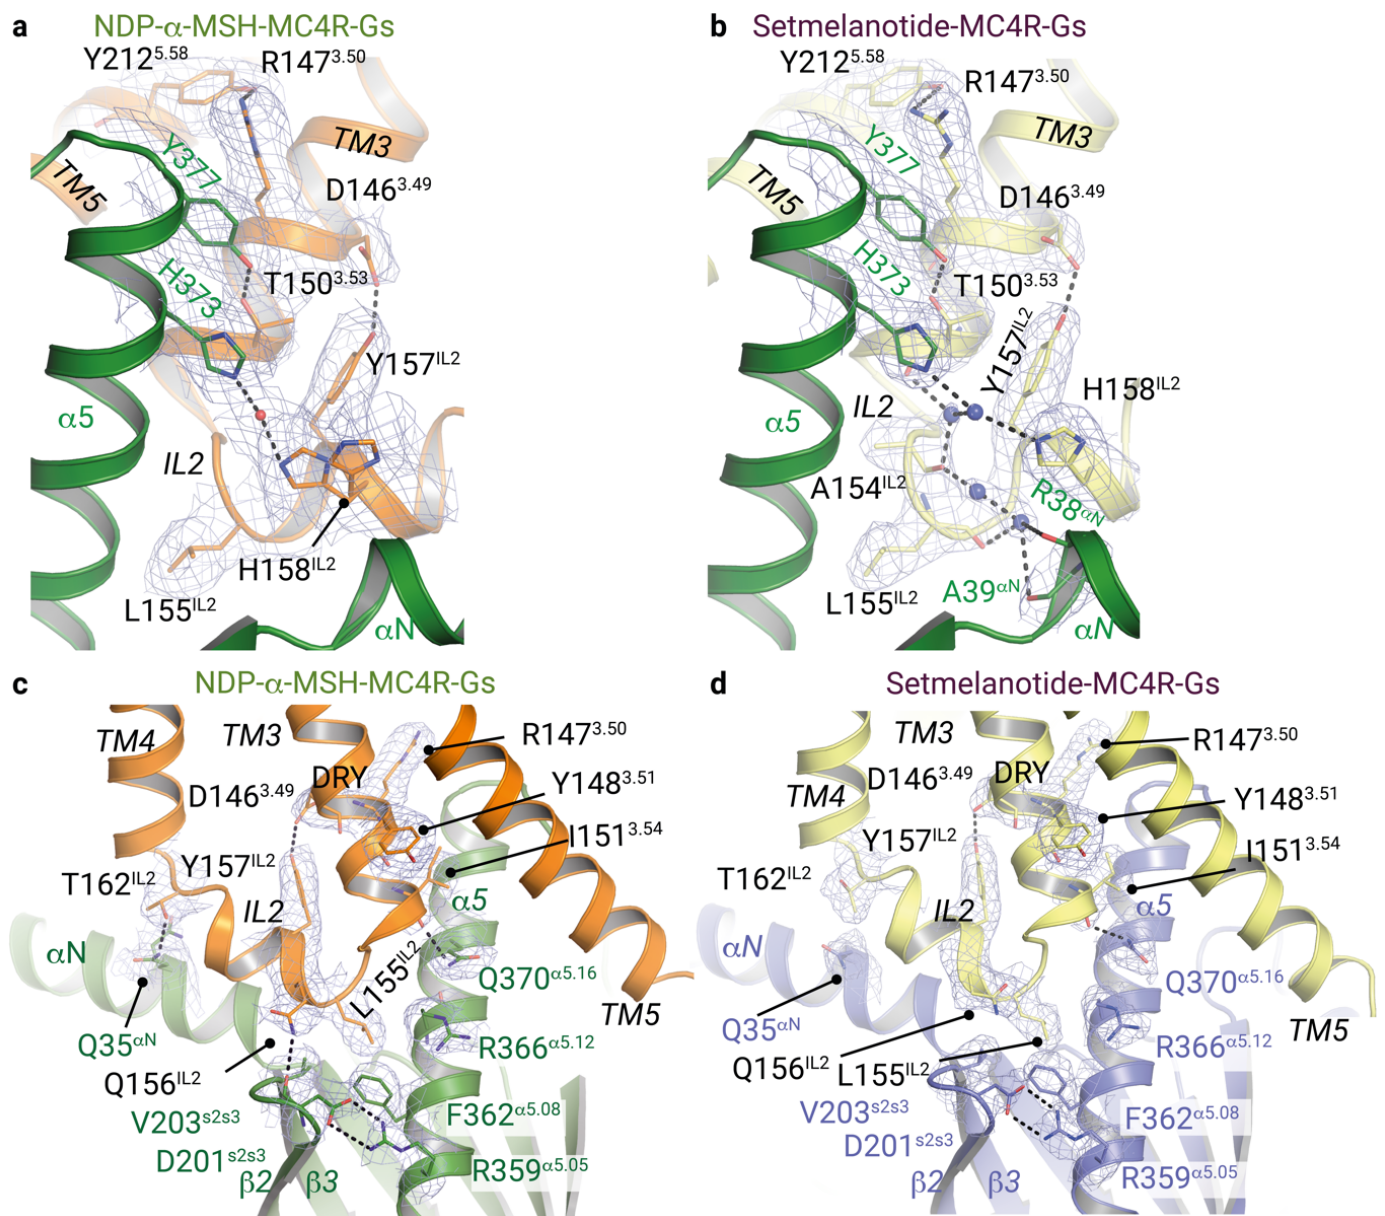

**Fig. S22: Cryo-EM map of selected residues at the MC4R-Gs protein interface.**

(a-b) Corresponding cryo-EM densities of residues highlighted in main Fig. 6d (a) and 6e (b) at a contour level of  $1.2 \sigma$ .

(c-d) Corresponding cryo-EM densities of residues highlighted in main Fig. 7a (c) and 7b (d) at a contour level of  $4 \sigma$ . For further details see legend Fig. 7.
