# Supplementary material for: Structures of active melanocortin-4 receptor–Gs-protein complexes with NDP-α-MSH and setmelanotide
Source: PubMed Central journal article supplement (PMC8563958; doi:10.1038/s41422-021-00569-8), 2021-09-24
Supplement: 41422_2021_569_MOESM23_ESM.pdf [file 41422_2021_569_MOESM23_ESM.pdf]

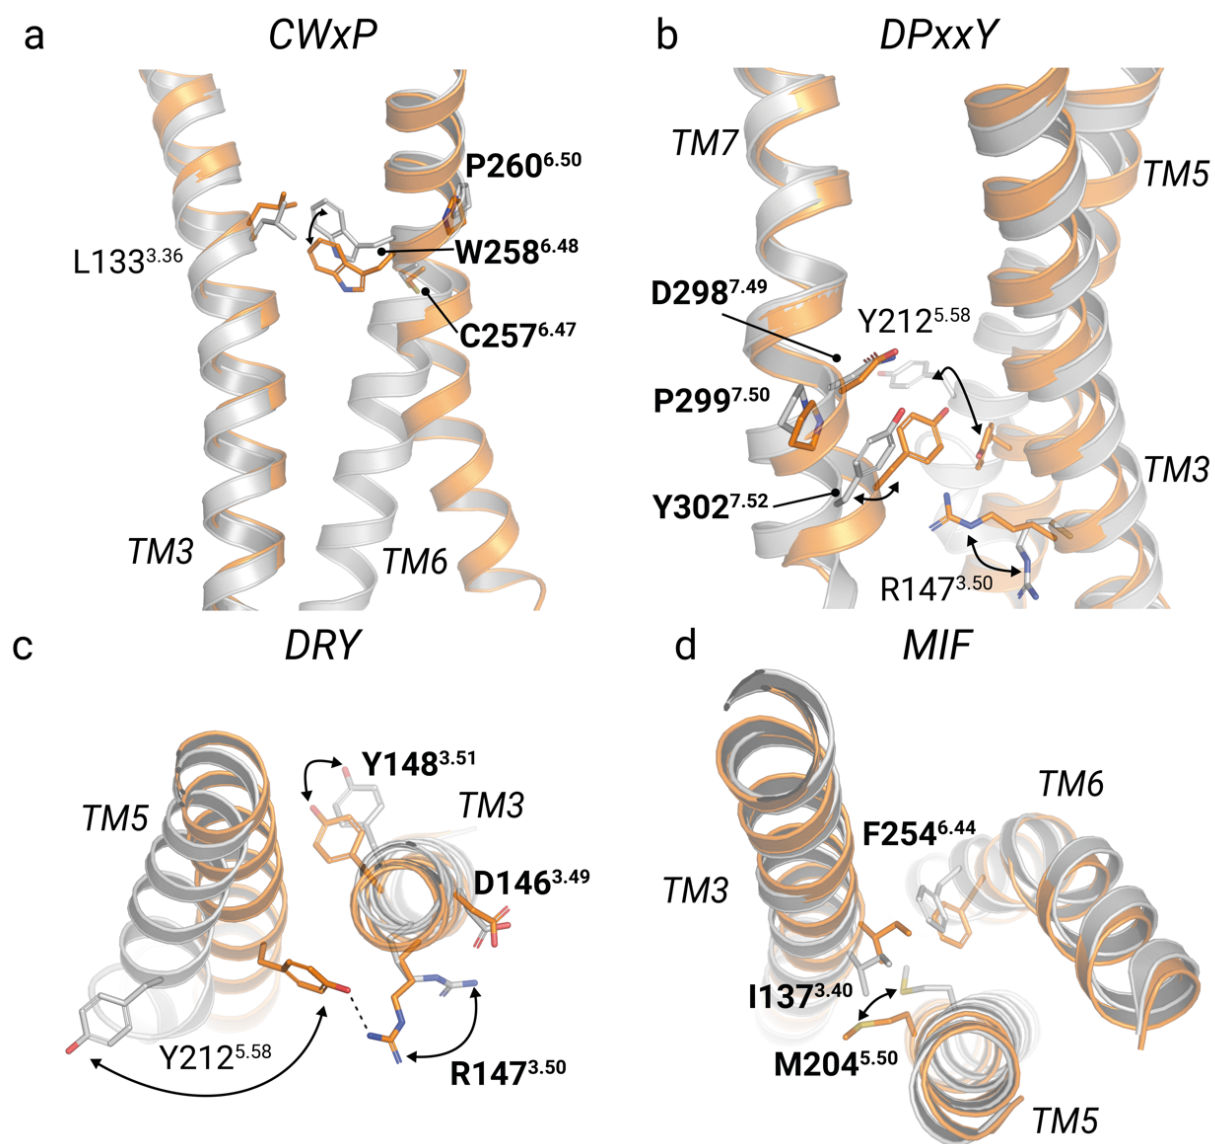

**Fig. S23: Comparison of amino acid side chains in highly conserved MC4R motifs between the inactivated and activated MC4R structures.**

(a) The *CWxP* motif with W<sup>6.48</sup> has been described in several GPCRs as central for the "toggle switch" activation mechanism. In MC4R W258<sup>6.48</sup> undergoes a toggle switch like motion after agonist binding and is located at the pivot point of the TM6 outward movement.

(b) The conserved *NPxxY* motif of class A GPCRs is in MC4R a *DPxxY* motif. Upon activation Y302<sup>7.52</sup> gets directed towards TM5 and TM7 and interacts with the Y<sup>5.58</sup> in TM5, which is crucial for the active state structure stabilization.

(c) The *DRY* motif is located at the top of the G-protein binding cavity and R147<sup>3.50</sup> is stabilized by Y212<sup>5.58</sup> in the active state. Additionally, in Fig. 6 the TM3-TM6 lock of the inactive state and in Fig. 7 the D146<sup>3.49</sup>-Y157<sup>IL</sup> interaction that stabilizes IL2 are highlighted.

(d) Most class A GPCRs are characterized by a bulge and kink supporting proline in TM5. In MC4R instead M204<sup>5.50</sup> leads to a regular helical conformation without any kink or bulge. This residue together with I137<sup>3.40</sup> in TM3 and F254<sup>6.54</sup> in TM6 forms the *MIF* motif, reminiscent to the so called "*PIF*" motif of class A GPCRs involved in regulation of the activity state.
