# Supplementary material for: Structures of active melanocortin-4 receptor–Gs-protein complexes with NDP-α-MSH and setmelanotide
Source: PubMed Central journal article supplement (PMC8563958; doi:10.1038/s41422-021-00569-8), 2021-09-24
Supplement: 41422_2021_569_MOESM25_ESM.pdf [file 41422_2021_569_MOESM25_ESM.pdf]

**Table S1: Data collection, processing, and refinement statistics**

|                                                     | <b>NDP-<math>\alpha</math>-MSH-MC4R-<br/>G<math>\alpha\beta\gamma</math>-Nb35 complex</b><br>PDB entry 7PIV<br>EMDB entry EMD-13454 | <b>Setmelanotide-MC4R-<br/>G<math>\alpha\beta\gamma</math>-Nb35 complex</b><br>PDB entry 7PIU<br>EMDB entry EMD-13453 |
|-----------------------------------------------------|-------------------------------------------------------------------------------------------------------------------------------------|-----------------------------------------------------------------------------------------------------------------------|
| Magnification                                       | 96000                                                                                                                               |                                                                                                                       |
| Voltage (kV)                                        | 300                                                                                                                                 |                                                                                                                       |
| Electron exposure (e <sup>-</sup> /Å <sup>2</sup> ) | 40                                                                                                                                  |                                                                                                                       |
| Defocus range (μm)                                  | -0.8 / -2.0                                                                                                                         |                                                                                                                       |
| Pixel size (Å)                                      | 0.832                                                                                                                               |                                                                                                                       |
| Symmetry imposed                                    | <i>C1</i>                                                                                                                           |                                                                                                                       |
| Micrographs used (total)                            | 5403 (5618)                                                                                                                         | 6979 (7583)                                                                                                           |
| Initial particle image (no.)                        | 2746119                                                                                                                             | 4330500                                                                                                               |
| Final particle images (no.)                         | 221682                                                                                                                              | 370621                                                                                                                |
| Map resolution (Å)                                  | 2.86                                                                                                                                | 2.58                                                                                                                  |
| FSC threshold                                       | 0.143                                                                                                                               | 0.143                                                                                                                 |
| <b>Refinement</b>                                   |                                                                                                                                     |                                                                                                                       |
| Initial model used (PDB entries)                    | 6W25 / 3SN6                                                                                                                         | NDP-MC4R-G $\alpha\beta\gamma$ -Nb35                                                                                  |
| Model resolution (Å)                                | 2.88                                                                                                                                | 2.60                                                                                                                  |
| Model resolution range (Å)                          | 233 – 2.88                                                                                                                          | 233 – 2.60                                                                                                            |
| Map sharpening B factor (Å <sup>2</sup> )           | -99                                                                                                                                 | -36                                                                                                                   |
| <b>Model composition</b>                            |                                                                                                                                     |                                                                                                                       |
| Total atoms                                         | 7814                                                                                                                                | 7788                                                                                                                  |
| Water                                               | 115                                                                                                                                 | 88                                                                                                                    |
| Protein atoms                                       | 7696                                                                                                                                | 7696                                                                                                                  |
| <b>B-factors (Å<sup>2</sup>)</b>                    |                                                                                                                                     |                                                                                                                       |
| Overall                                             | 69.37                                                                                                                               | 48.11                                                                                                                 |
| R.m.s. deviations bond length (Å)                   | 0.013                                                                                                                               | 0.013                                                                                                                 |
| R.m.s. deviations bond angle (°)                    | 1.705                                                                                                                               | 1.707                                                                                                                 |
| <b>Validation</b>                                   |                                                                                                                                     |                                                                                                                       |
| Molprobit score                                     | 1.54                                                                                                                                | 1.42                                                                                                                  |
| Clash score                                         | 3.53                                                                                                                                | 3.39                                                                                                                  |
| Poor rotamers (%)                                   | 0.86                                                                                                                                | 0.97                                                                                                                  |
| <b>Ramachandran plot</b>                            |                                                                                                                                     |                                                                                                                       |
| Favoured (%)                                        | 94.09                                                                                                                               | 95.77                                                                                                                 |
| Allowed (%)                                         | 5.70                                                                                                                                | 4.13                                                                                                                  |
| Disallowed (%)                                      | 0.21                                                                                                                                | 0.11                                                                                                                  |
