# Supplementary material for: Structures of active melanocortin-4 receptor–Gs-protein complexes with NDP-α-MSH and setmelanotide
Source: PubMed Central journal article supplement (PMC8563958; doi:10.1038/s41422-021-00569-8), 2021-09-24
Supplement: 41422_2021_569_MOESM26_ESM.pdf [file 41422_2021_569_MOESM26_ESM.pdf]

**Table S2: Contact distances between MC4R and NDP- $\alpha$ -MSH.** Interactions between the binding peptide and the MC4R were analyzed using CONTACT, a program of the CCP4 software suite <sup>15</sup>. Interactions were calculated between any atoms of the peptide and the receptor, water molecules as well as the calcium ion with a maximum distance of 3.9 Å. Potential hydrogen bonds with a maximum distance of 3.5 Å are highlighted bold. D-phenylalanine and norleucine are abbreviated as three letter codes Dpn and Nle, respectively.

| Source     | Number/<br>Chain | Atom       | Target     | Number/<br>Chain | Atom       | Distance [Å] |
|------------|------------------|------------|------------|------------------|------------|--------------|
| Phe        | 51R              | CD2        | His        | 6P               | CE1        | 3.83         |
|            |                  |            | His        | 6P               | NE2        | 3.31         |
| Phe        | 51R              | CE2        | His        | 6P               | CE1        | 3.44         |
|            |                  |            | His        | 6P               | CD2        | 3.69         |
|            |                  |            | His        | 6P               | NE2        | 3.24         |
| Phe        | 51R              | CZ         | His        | 6P               | CD2        | 3.76         |
|            |                  |            | His        | 6P               | NE2        | 3.81         |
| Glu        | 100R             | CD         | Nle        | 4P               | CE         | 3.76         |
| Glu        | 100R             | OE2        | Nle        | 4P               | CE         | 3.63         |
|            |                  |            | Glu        | 5P               | O          | 3.66         |
|            |                  |            | <b>Ca</b>  | <b>1F</b>        | <b>CA</b>  | <b>3.20</b>  |
| Thr        | 101R             | CA         | His        | 6P               | NE2        | 3.89         |
| Thr        | 101R             | OG1        | His        | 6P               | CD2        | 3.64         |
|            |                  |            | <b>His</b> | <b>6P</b>        | <b>NE2</b> | <b>3.06</b>  |
| Ile        | 104R             | CG2        | Nle        | 4P               | CE         | 3.09         |
| Asp        | 122R             | CG         | Nle        | 4P               | CB         | 3.60         |
|            |                  |            | Nle        | 4P               | CD         | 3.62         |
|            |                  |            | Nle        | 4P               | CE         | 3.89         |
| Asp        | 122R             | OD1        | Nle        | 4P               | CB         | 3.77         |
|            |                  |            | Nle        | 4P               | CG         | 3.88         |
|            |                  |            | Nle        | 4P               | CD         | 2.91         |
|            |                  |            | Nle        | 4P               | CE         | 3.14         |
| Asp        | 122R             | OD2        | Nle        | 4P               | CB         | 2.93         |
|            |                  |            | Nle        | 4P               | CG         | 3.87         |
|            |                  |            | Nle        | 4P               | CD         | 3.68         |
|            |                  |            | Nle        | 4P               | CE         | 3.85         |
|            |                  |            | <b>Ca</b>  | <b>1F</b>        | <b>CA</b>  | <b>3.09</b>  |
| Asp        | 126R             | CB         | Arg        | 8P               | NH2        | 3.64         |
| Asp        | 126R             | CG         | Arg        | 8P               | NE         | 3.68         |
|            |                  |            | Arg        | 8P               | NH2        | 3.69         |
|            |                  |            | Ca         | 1F               | CA         | 3.50         |
| <b>Asp</b> | <b>126R</b>      | <b>OD1</b> | <b>Ca</b>  | <b>1F</b>        | <b>CA</b>  | <b>3.33</b>  |
| Asp        | 126R             | OD2        | Dpn        | 7P               | O          | 3.78         |
|            |                  |            | Arg        | 8P               | CD         | 3.72         |
|            |                  |            | <b>Arg</b> | <b>8P</b>        | <b>NE</b>  | <b>2.59</b>  |
|            |                  |            | Arg        | 8P               | CZ         | 3.19         |
|            |                  |            | <b>Arg</b> | <b>8P</b>        | <b>NH2</b> | <b>2.95</b>  |
|            |                  |            | <b>Ca</b>  | <b>1F</b>        | <b>CA</b>  | <b>2.93</b>  |
| Ile        | 129R             | CG2        | Dpn        | 7P               | CG         | 3.64         |
|            |                  |            | Dpn        | 7P               | CD2        | 3.43         |
|            |                  |            | Dpn        | 7P               | CE2        | 3.64         |
| Ile        | 129R             | CD1        | Dpn        | 7P               | CB         | 3.68         |
| <b>Ile</b> | <b>185R</b>      | <b>O</b>   | <b>Arg</b> | <b>8P</b>        | <b>NH1</b> | <b>3.50</b>  |

|                  |           |           |              |            |            |             |
|------------------|-----------|-----------|--------------|------------|------------|-------------|
| Ile              | 185R      | CG2       | Arg          | 8P         | NH2        | 3.39        |
| Ser              | 188R      | CA        | Trp          | 9P         | CZ2        | 3.86        |
|                  |           |           | Trp          | 9P         | NE1        | 3.76        |
| Ser              | 188R      | C         | Trp          | 9P         | NE1        | 3.60        |
| Ser              | 188R      | O         | Trp          | 9P         | CD1        | 3.87        |
|                  |           |           | <b>Trp</b>   | <b>9P</b>  | <b>NE1</b> | <b>2.95</b> |
| Ser              | 188R      | CB        | Arg          | 8P         | NH1        | 3.28        |
|                  |           |           | Trp          | 9P         | CZ2        | 3.81        |
|                  |           |           | Trp          | 9P         | NE1        | 3.75        |
| Ser              | 188R      | OG        | Arg          | 8P         | CZ         | 3.88        |
|                  |           |           | <b>Arg</b>   | <b>8P</b>  | <b>NH1</b> | <b>2.64</b> |
| Val              | 193R      | CG1       | Trp          | 9P         | CZ2        | 3.82        |
| Ile              | 194R      | CG1       | Trp          | 9P         | CD1        | 3.88        |
|                  |           |           | Trp          | 9P         | NE1        | 3.68        |
| Ile              | 194R      | CD1       | Trp          | 9P         | CD1        | 3.64        |
|                  |           |           | Trp          | 9P         | NE1        | 3.75        |
| Leu              | 197R      | CD1       | Trp          | 9P         | CZ3        | 3.78        |
|                  |           |           | Trp          | 9P         | CH2        | 3.63        |
| His              | 264R      | CD2       | Trp          | 9P         | O          | 3.71        |
| His              | 264R      | CE1       | Gly          | 10P        | O          | 3.64        |
| His              | 264R      | NE2       | Gly          | 10P        | O          | 3.67        |
|                  |           |           | <b>Trp</b>   | <b>9P</b>  | <b>O</b>   | <b>3.03</b> |
| Tyr              | 268R      | CD2       | Trp          | 9P         | O          | 3.18        |
| Tyr              | 268R      | CE2       | Trp          | 9P         | CB         | 3.86        |
|                  |           |           | Trp          | 9P         | CA         | 3.73        |
|                  |           |           | Trp          | 9P         | C          | 3.76        |
|                  |           |           | Lys          | 11P        | O          | 3.27        |
|                  |           |           | Trp          | 9P         | O          | 3.25        |
|                  |           |           | Pro          | 12P        | CA         | 3.86        |
|                  |           |           | Pro          | 12P        | O          | 3.59        |
| Tyr              | 268R      | CZ        | Pro          | 12P        | O          | 3.56        |
| Tyr              | 268R      | OH        | Lys          | 11P        | O          | 3.90        |
|                  |           |           | Pro          | 12P        | O          | 3.55        |
| Phe              | 284R      | CG        | Gly          | 10P        | CA         | 3.49        |
| Phe              | 284R      | CD1       | Gly          | 10P        | CA         | 3.60        |
| Phe              | 284R      | CD2       | Gly          | 10P        | CA         | 3.43        |
| Phe              | 284R      | CE1       | Gly          | 10P        | CA         | 3.68        |
| Phe              | 284R      | CE2       | His          | 6P         | O          | 3.43        |
|                  |           |           | Gly          | 10P        | CA         | 3.51        |
| Phe              | 284R      | CZ        | Gly          | 10P        | CA         | 3.63        |
|                  |           |           | Arg          | 8P         | O          | 3.43        |
|                  |           |           | Gly          | 10P        | N          | 3.78        |
| Leu              | 288R      | CD1       | His          | 6P         | CB         | 3.55        |
| Leu              | 288R      | CD2       | Dpn          | 7P         | CD2        | 3.89        |
| Ca <sup>2+</sup> | <b>1F</b> | <b>CA</b> | <b>Glu</b>   | <b>5P</b>  | <b>O</b>   | <b>2.68</b> |
|                  |           |           | Glu          | 5P         | C          | 3.88        |
| Ca <sup>2+</sup> | <b>1F</b> | <b>CA</b> | <b>Dpn</b>   | <b>7P</b>  | <b>O</b>   | <b>2.50</b> |
|                  |           |           | Dpn          | 7P         | C          | 3.72        |
| Nle              | <b>4P</b> | <b>O</b>  | <b>water</b> | <b>43H</b> | <b>O</b>   | <b>2.78</b> |
