# Supplementary material for: Structures of active melanocortin-4 receptor–Gs-protein complexes with NDP-α-MSH and setmelanotide
Source: PubMed Central journal article supplement (PMC8563958; doi:10.1038/s41422-021-00569-8), 2021-09-24
Supplement: 41422_2021_569_MOESM27_ESM.pdf [file 41422_2021_569_MOESM27_ESM.pdf]

**Table S3: Contact distances between MC4R and the agonist setmelanotide.** Interactions between the binding peptide and the MC4R were analyzed using CONTACT, a program of the CCP4 software suite <sup>15</sup>. Interactions were calculated between any atoms of the peptide and the receptor, water molecules as well as the calcium ion with a maximum distance of 3.9 Å. Potential hydrogen bonds with a maximum distance of 3.5 Å are highlighted bold. D-phenylalanine and D-alanine are abbreviated as three letter codes Dpn and Dal, respectively. \*Amino acids in double conformation (amino acid rotamers A and B).

| Source         | Number/<br>Chain | Atom       | Target     | Number/<br>Chain | Atom       | Distance [Å] |
|----------------|------------------|------------|------------|------------------|------------|--------------|
| Phe            | 51R              | CD2        | His        | 4P               | CE1        | 3.56         |
| Phe            | 51R              | CE2        | His        | 4P               | CE1        | 3.47         |
|                |                  |            | His        | 4P               | NE2        | 3.46         |
| Phe            | 51R              | CZ         | His        | 4P               | CE1        | 3.74         |
|                |                  |            | His        | 4P               | NE2        | 3.83         |
|                |                  |            | His        | 4P               | ND1        | 3.88         |
|                |                  |            | His        | 4P               | CE1        | 3.56         |
| Glu(A)*        | 100R             | OE1        | Dpn        | 5P               | N          | 3.57         |
| <b>Glu(A)*</b> | <b>100R</b>      | <b>OE2</b> | <b>Ca</b>  | <b>1F</b>        | <b>CA</b>  | <b>3.02</b>  |
| Glu(B)*        | 100R             | OE1        | Dal        | 3P               | O          | 3.88         |
| <b>Glu(B)*</b> | <b>100R</b>      | <b>OE2</b> | <b>Ca</b>  | <b>1F</b>        | <b>CA</b>  | <b>2.90</b>  |
| Thr            | 101R             | CB         | His        | 4P               | CE1        | 3.84         |
| <b>Thr</b>     | <b>101R</b>      | <b>OG1</b> | <b>His</b> | <b>4P</b>        | <b>ND1</b> | <b>3.39</b>  |
|                |                  |            | His        | 4P               | CE1        | 2.86         |
| Ile            | 104R             | CG1        | Dal        | 3P               | O          | 3.69         |
| Ile            | 104R             | CD1        | Dal        | 3P               | O          | 3.89         |
| Asp            | 122R             | CG         | Arg        | 1P               | NH1        | 3.81         |
| <b>Asp</b>     | <b>122R</b>      | <b>OD1</b> | <b>Arg</b> | <b>6P</b>        | <b>NH1</b> | <b>3.12</b>  |
| Asp            | 122R             | OD2        | Arg        | 1P               | CZ         | 3.58         |
|                |                  |            | <b>Arg</b> | <b>1P</b>        | <b>NH1</b> | <b>2.80</b>  |
|                |                  |            | <b>Ca</b>  | <b>1F</b>        | <b>CA</b>  | <b>3.35</b>  |
| <b>Asn</b>     | <b>123R</b>      | <b>ND2</b> | <b>Arg</b> | <b>6P</b>        | <b>NH1</b> | <b>3.16</b>  |
| Asp            | 126R             | CB         | Arg        | 6P               | NH1        | 3.72         |
| Asp            | 126R             | CG         | Arg        | 6P               | NE         | 3.67         |
|                |                  |            | Arg        | 6P               | NH1        | 3.35         |
|                |                  |            | Ca         | 1F               | CA         | 3.34         |
| <b>Asp</b>     | <b>126R</b>      | <b>OD1</b> | <b>Ca</b>  | <b>1F</b>        | <b>CA</b>  | <b>2.87</b>  |
| <b>Asp</b>     | <b>126R</b>      | <b>OD2</b> | <b>Dpn</b> | <b>5P</b>        | <b>O</b>   | <b>3.42</b>  |
|                |                  |            | <b>Arg</b> | <b>6P</b>        | <b>NE</b>  | <b>2.65</b>  |
|                |                  |            | <b>Arg</b> | <b>6P</b>        | <b>NH1</b> | <b>2.54</b>  |
|                |                  |            | <b>Ca</b>  | <b>1F</b>        | <b>CA</b>  | <b>3.07</b>  |
|                |                  |            | Arg        | 6P               | CD         | 3.88         |
|                |                  |            | Arg        | 6P               | CZ         | 2.95         |
|                |                  |            | Arg        | 6P               | CB         | 3.88         |
| Ile            | 129R             | CG2        | Dpn        | 5P               | CG         | 3.61         |
|                |                  |            | Dpn        | 5P               | CD1        | 3.86         |
|                |                  |            | Dpn        | 5P               | CD2        | 3.61         |
|                |                  |            | Dpn        | 5P               | CE2        | 3.88         |
| Ile            | 129R             | CD1        | Dpn        | 5P               | CB         | 3.82         |
| Leu            | 133R             | CD1        | Dpn        | 5P               | CE2        | 3.46         |
|                |                  |            | Dpn        | 5P               | CZ         | 3.69         |

|                        |             |           |            |           |            |             |
|------------------------|-------------|-----------|------------|-----------|------------|-------------|
| Ser                    | 188R        | CA        | Trp        | 7P        | NE1        | 3.66        |
| Ser                    | 188R        | C         | Trp        | 7P        | NE1        | 3.62        |
| Ser                    | 188R        | O         | Trp        | 7P        | CD1        | 3.79        |
|                        |             |           | <b>Trp</b> | <b>7P</b> | <b>NE1</b> | <b>3.07</b> |
| Ser                    | 188R        | CB        | Arg        | 6P        | CD         | 3.56        |
|                        |             |           | Trp        | 7P        | NE1        | 3.50        |
| <b>Ser</b>             | <b>188R</b> | <b>OG</b> | <b>Arg</b> | <b>6P</b> | <b>NH2</b> | <b>3.42</b> |
| Ile                    | 194R        | CD1       | Trp        | 7P        | CD2        | 3.57        |
|                        |             |           | Trp        | 7P        | CG         | 3.68        |
|                        |             |           | Trp        | 7P        | CD1        | 3.63        |
|                        |             |           | Trp        | 7P        | NE1        | 3.52        |
|                        |             |           | Trp        | 7P        | CE2        | 3.48        |
| Leu                    | 197R        | CD1       | Trp        | 7P        | CH2        | 3.81        |
| Phe                    | 261R        | CZ        | Dpn        | 5P        | CE2        | 3.49        |
| His                    | 264R        | CD2       | Trp        | 7P        | O          | 3.58        |
| His                    | 264R        | CE1       | Cys        | 8P        | C          | 3.80        |
| His                    | 264R        | NE2       | Cys        | 8P        | CA         | 3.67        |
|                        |             |           | Cys        | 8P        | C          | 3.65        |
|                        |             |           | Trp        | 7P        | C          | 3.90        |
|                        |             |           | <b>Trp</b> | <b>7P</b> | <b>O</b>   | <b>2.91</b> |
| Tyr                    | 268R        | CG        | Trp        | 7P        | O          | 3.71        |
| Tyr                    | 268R        | CD1       | Trp        | 7P        | C          | 3.86        |
|                        |             |           | Trp        | 7P        | O          | 3.15        |
| Tyr                    | 268R        | CE1       | Trp        | 7P        | CA         | 3.84        |
|                        |             |           | Trp        | 7P        | C          | 3.52        |
|                        |             |           | Trp        | 7P        | O          | 3.27        |
| Tyr                    | 268R        | CE2       | Trp        | 7P        | CB         | 3.82        |
| Tyr                    | 268R        | CZ        | Trp        | 7P        | CA         | 3.69        |
|                        |             |           | Trp        | 7P        | CB         | 3.89        |
|                        |             |           | Trp        | 7P        | O          | 3.89        |
| Tyr                    | 268R        | OH        | Trp        | 7P        | CA         | 3.81        |
| Phe                    | 284R        | CG        | Cys        | 8P        | CA         | 3.82        |
|                        |             |           | Cys        | 8P        | CB         | 3.76        |
| Phe                    | 284R        | CD2       | His        | 4P        | O          | 3.72        |
|                        |             |           | Cys        | 8P        | CA         | 3.88        |
|                        |             |           | Cys        | 8P        | CB         | 3.39        |
| Phe                    | 284R        | CE1       | Arg        | 6P        | O          | 3.68        |
| Phe                    | 284R        | CE2       | His        | 4P        | O          | 3.03        |
|                        |             |           | Cys        | 8P        | CB         | 3.71        |
|                        |             |           | Arg        | 6P        | O          | 3.86        |
| Phe                    | 284R        | CZ        | Arg        | 6P        | N          | 3.86        |
|                        |             |           | Arg        | 6P        | O          | 3.08        |
| Asn                    | 285R        | ND2       | His        | 4P        | CD2        | 3.51        |
| Leu                    | 288R        | CD1       | His        | 4P        | CB         | 3.49        |
| <b>Ca<sup>2+</sup></b> | <b>1F</b>   | <b>CA</b> | <b>Dpn</b> | <b>5</b>  | <b>O</b>   | <b>2.64</b> |
| Ca <sup>2+</sup>       | 1F          | CA        | Dpn        | 5         | C          | 3.82        |
| <b>water</b>           | <b>30H</b>  | <b>O</b>  | <b>His</b> | <b>4P</b> | <b>N</b>   | <b>3.41</b> |
| <b>water</b>           | <b>62H</b>  | <b>O</b>  | <b>His</b> | <b>4P</b> | <b>NE2</b> | <b>2.50</b> |
| <b>water</b>           | <b>63H</b>  | <b>O</b>  | <b>Arg</b> | <b>1P</b> | <b>NE</b>  | <b>3.44</b> |
