# Supplementary material for: Structures of active melanocortin-4 receptor–Gs-protein complexes with NDP-α-MSH and setmelanotide
Source: PubMed Central journal article supplement (PMC8563958; doi:10.1038/s41422-021-00569-8), 2021-09-24
Supplement: 41422_2021_569_MOESM28_ESM.pdf [file 41422_2021_569_MOESM28_ESM.pdf]

**Table S4: Contact distances between MC4R and the antagonist SHU9119.** Interactions between the binding peptide and the MC4R were analyzed using CONTACT, a program of the CCP4 software suite<sup>15</sup>. Interactions were calculated between any atoms of the peptide and the receptor, water molecules as well as the calcium ion with a maximum distance of 3.9 Å. Potential hydrogen bonds with a maximum distance of 3.5 Å are highlighted bold. D-Nal corresponds to (2R)-2-amino-3-(naphthalene-2-YL)propanoic acid abbreviated as 4J2 in the protein database (PDB ID: 6w25). Norleucine is shown as Nle in the three letter code. At the second position of the SHU9119 peptide there is a homoserine. In the corresponding pdb file (PDB ID: 6w25), this amino acid is abbreviated as Asp B2.

| Source | Number/<br>Chain | Atom | Target      | Number/<br>Chain | Atom       | Distance [Å] |
|--------|------------------|------|-------------|------------------|------------|--------------|
| Leu    | 97A              | CD2  | DNal        | 4B               | CB         | 3.80         |
| Glu    | 100A             | CD   | Asp         | 2B               | O          | 3.77         |
|        |                  |      | His         | 3B               | CA         | 3.86         |
|        |                  |      | DNal        | 4B               | N          | 3.45         |
|        |                  |      | Ca          | 2101A            | CA         | 3.37         |
| Glu    | 100A             | OE1  | His         | 3B               | CA         | 3.45         |
|        |                  |      | His         | 3B               | C          | 3.56         |
|        |                  |      | <b>DNal</b> | <b>4B</b>        | <b>N</b>   | <b>2.78</b>  |
|        |                  |      | DNal        | 4B               | CA         | 3.71         |
|        |                  |      | DNal        | 4B               | CB         | 3.53         |
|        |                  |      | <b>Ca</b>   | <b>2101A</b>     | <b>CA</b>  | <b>2.21</b>  |
|        |                  |      | DNal        | 4B               | O          | 3.59         |
| Glu    | 100A             | OE2  | <b>Asp</b>  | <b>2B</b>        | <b>O</b>   | <b>3.25</b>  |
|        |                  |      | <b>DNal</b> | <b>4B</b>        | <b>N</b>   | <b>3.48</b>  |
|        |                  |      | <b>Ca</b>   | <b>2101A</b>     | <b>CA</b>  | <b>2.21</b>  |
|        |                  |      | DNal        | 4B               | O          | 3.59         |
| Thr    | 101A             | CA   | His         | 3B               | NE2        | 3.76         |
| Thr    | 101A             | CB   | His         | 3B               | NE2        | 3.71         |
| Thr    | 101A             | OG1  | His         | 3B               | CD2        | 3.30         |
|        |                  |      | <b>His</b>  | <b>3B</b>        | <b>NE2</b> | <b>3.31</b>  |
| Thr    | 101A             | CG2  | His         | 3B               | NE2        | 3.51         |
| Val    | 103A             | CG1  | Nle         | 1B               | CE         | 3.78         |
| Ile    | 104A             | CG1  | Nle         | 1B               | CD         | 3.82         |
| Ile    | 104A             | CD1  | Asp         | 2B               | C          | 3.66         |
|        |                  |      | His         | 3B               | N          | 3.52         |
|        |                  |      | His         | 3B               | CG         | 3.87         |
|        |                  |      | His         | 3B               | ND1        | 3.80         |
|        |                  |      | His         | 3B               | CE1        | 3.87         |
|        |                  |      | Nle         | 1B               | CE         | 3.77         |
|        |                  |      | Nle         | 1B               | CB         | 3.84         |
| Asp    | 122A             | CG   | Nle         | 1B               | CD         | 3.80         |
|        |                  |      | Nle         | 1B               | CE         | 3.83         |
|        |                  |      | Nle         | 1B               | CB         | 3.56         |
|        |                  |      | Nle         | 1B               | CD         | 3.85         |
| Asp    | 122A             | OD1  | Ca          | 2101A            | CA         | 3.27         |
|        |                  |      | Nle         | 1B               | CB         | 3.74         |
|        |                  |      | Nle         | 1B               | CD         | 3.47         |
| Asp    | 122A             | OD2  | Asp         | 2B               | O          | 3.54         |
|        |                  |      | <b>Ca</b>   | <b>2101A</b>     | <b>CA</b>  | <b>2.27</b>  |
|        |                  |      | Nle         | 1B               | CB         | 3.78         |

|            |             |            |             |              |            |             |
|------------|-------------|------------|-------------|--------------|------------|-------------|
|            |             |            | <b>Arg</b>  | <b>5B</b>    | <b>NH1</b> | <b>3.18</b> |
|            |             |            | Ca          | 2101A        | CA         | 3.65        |
| Asn        | 123A        | CA         | Arg         | 5B           | NH1        | 3.79        |
| Asn        | 123A        | CG         | Arg         | 5B           | NH1        | 3.83        |
| Asn        | 123A        | OD1        | Arg         | 5B           | NH2        | 3.79        |
|            |             |            | Arg         | 5B           | CZ         | 3.72        |
|            |             |            | <b>Arg</b>  | <b>5B</b>    | <b>NH1</b> | <b>2.83</b> |
| Asp        | 126A        | O          | DNal        | 4B           | CE3        | 3.56        |
| Asp        | 126A        | CB         | Arg         | 5B           | NE         | 3.52        |
| Asp        | 126A        | CG         | DNal        | 4B           | O          | 3.55        |
|            |             |            | Arg         | 5B           | NH1        | 3.83        |
|            |             |            | Arg         | 5B           | NE         | 3.38        |
|            |             |            | Ca          | 2101A        | CA         | 3.04        |
| <b>Asp</b> | <b>126A</b> | <b>OD1</b> | <b>DNal</b> | <b>4B</b>    | <b>O</b>   | <b>3.02</b> |
|            |             |            | DNal        | 4B           | C          | 3.61        |
|            |             |            | DNal        | 4B           | CD2        | 3.60        |
|            |             |            | DNal        | 4B           | CB         | 3.50        |
|            |             |            | <b>Ca</b>   | <b>2101A</b> | <b>CA</b>  | <b>2.64</b> |
| Asp        | 126A        | OD2        | DNal        | 4B           | O          | 3.54        |
|            |             |            | Arg         | 5B           | CZ         | 3.26        |
|            |             |            | <b>Arg</b>  | <b>5B</b>    | <b>NH1</b> | <b>2.85</b> |
|            |             |            | <b>Arg</b>  | <b>5B</b>    | <b>NE</b>  | <b>2.80</b> |
|            |             |            | <b>Ca</b>   | <b>2101A</b> | <b>CA</b>  | <b>2.73</b> |
| Ile        | 129A        | CG2        | DNal        | 4B           | CD2        | 3.81        |
|            |             |            | DNal        | 4B           | CZ1        | 3.58        |
|            |             |            | DNal        | 4B           | CE2        | 3.65        |
|            |             |            | DNal        | 4B           | CD1        | 3.82        |
|            |             |            | DNal        | 4B           | CE1        | 3.67        |
|            |             |            | DNal        | 4B           | CB         | 3.61        |
|            |             |            | DNal        | 4B           | CG         | 3.82        |
| Cys        | 130A        | CA         | DNal        | 4B           | CE4        | 3.69        |
| Cys        | 130A        | CB         | DNal        | 4B           | CE4        | 3.50        |
| Cys        | 130A        | SG         | DNal        | 4B           | CE4        | 3.78        |
| Leu        | 133A        | CD2        | DNal        | 4B           | CZ2        | 3.84        |
|            |             |            | DNal        | 4B           | CZ3        | 3.63        |
| <b>Ile</b> | <b>185A</b> | <b>O</b>   | <b>Arg</b>  | <b>5B</b>    | <b>NH2</b> | <b>3.36</b> |
| Ile        | 185A        | CG2        | Arg         | 5B           | NH2        | 3.73        |
|            |             |            | Arg         | 5B           | CZ         | 3.61        |
|            |             |            | Arg         | 5B           | NH1        | 3.72        |
| Ile        | 185A        | CD1        | Arg         | 5B           | CD         | 3.66        |
|            |             |            | DNal        | 4B           | CE3        | 3.82        |
| Ser        | 188A        | C          | Trp         | 6B           | NE1        | 3.54        |
| Ser        | 188A        | O          | Trp         | 6B           | CD1        | 3.69        |
|            |             |            | <b>Trp</b>  | <b>6B</b>    | <b>NE1</b> | <b>2.78</b> |
|            |             |            | Trp         | 6B           | CE2        | 3.72        |
| Ser        | 188A        | CB         | Arg         | 5B           | NH2        | 3.47        |
|            |             |            | Arg         | 5B           | CD         | 3.69        |
|            |             |            | Trp         | 6B           | NE1        | 3.77        |
|            |             |            | Trp         | 6B           | CZ2        | 3.85        |
| <b>Ser</b> | <b>188A</b> | <b>OG</b>  | <b>Arg</b>  | <b>5B</b>    | <b>NH2</b> | <b>2.83</b> |
| Ile        | 194A        | CG1        | Trp         | 6B           | NE1        | 3.65        |
| Ile        | 194A        | CD1        | Trp         | 6B           | CD1        | 3.78        |
|            |             |            | Trp         | 6B           | NE1        | 3.60        |
| Leu        | 197A        | CD1        | Trp         | 6B           | CH2        | 3.68        |

|                        |              |           |              |             |            |             |
|------------------------|--------------|-----------|--------------|-------------|------------|-------------|
|                        |              |           | DNal         | 4B          | CE1        | 3.62        |
| Phe                    | 261A         | CE2       | DNal         | 4B          | CZ2        | 3.71        |
| Phe                    | 261A         | CZ        | DNal         | 4B          | CZ1        | 3.65        |
|                        |              |           | DNal         | 4B          | CZ2        | 3.44        |
|                        |              |           | DNal         | 4B          | CE1        | 3.51        |
| His                    | 264A         | CD2       | Trp          | 6B          | O          | 3.28        |
|                        |              |           | Nh2          | 8B          | N          | 3.32        |
| His                    | 264A         | NE2       | Trp          | 6B          | C          | 3.73        |
|                        |              |           | Lys          | 7B          | CA         | 3.55        |
|                        |              |           | Lys          | 7B          | C          | 3.77        |
|                        |              |           | <b>Trp</b>   | <b>6B</b>   | <b>O</b>   | <b>2.70</b> |
|                        |              |           | <b>Nh2</b>   | <b>8B</b>   | <b>N</b>   | <b>3.45</b> |
| Leu                    | 265A         | CD1       | Trp          | 6B          | CB         | 3.81        |
|                        |              |           | Trp          | 6B          | CE3        | 3.57        |
| Tyr                    | 268A         | CD1       | Trp          | 6B          | C          | 3.75        |
|                        |              |           | Trp          | 6B          | O          | 3.30        |
|                        |              |           | Trp          | 6B          | CB         | 3.88        |
| Tyr                    | 268A         | CE1       | Trp          | 6B          | CA         | 3.71        |
|                        |              |           | Wat          | 103B        | O          | 3.63        |
|                        |              |           | Trp          | 6B          | C          | 3.71        |
|                        |              |           | Lys          | 7B          | O          | 3.80        |
|                        |              |           | Trp          | 6B          | O          | 3.71        |
| Tyr                    | 268A         | CE2       | Trp          | 6B          | CD1        | 3.56        |
| Tyr                    | 268A         | CZ        | Trp          | 6B          | CD1        | 3.90        |
| Tyr                    | 268A         | OH        | Wat          | 102B        | O          | 3.89        |
|                        |              |           | <b>Wat</b>   | <b>103B</b> | <b>O</b>   | <b>3.47</b> |
| Met                    | 281A         | O         | Nh2          | 8B          | N          | 3.86        |
| Met                    | 281A         | CE        | Nh2          | 8B          | N          | 3.65        |
| Phe                    | 284A         | CG        | Lys          | 7B          | CB         | 3.90        |
| Phe                    | 284A         | CD2       | Lys          | 7B          | CB         | 3.42        |
| Phe                    | 284A         | CE1       | Arg          | 5B          | O          | 3.81        |
| Phe                    | 284A         | CE2       | Lys          | 7B          | CB         | 3.62        |
|                        |              |           | His          | 3B          | O          | 3.17        |
| Phe                    | 284A         | CZ        | Arg          | 5B          | O          | 3.30        |
| Leu                    | 288A         | CD1       | His          | 3B          | CB         | 3.48        |
| Leu                    | 288A         | CD2       | DNal         | 4B          | CD1        | 3.71        |
| <b>water</b>           | <b>101B</b>  | <b>O</b>  | <b>Asp</b>   | <b>2B</b>   | <b>OD1</b> | <b>2.41</b> |
| <b>water</b>           | <b>102B</b>  | <b>O</b>  | <b>Trp</b>   | <b>6B</b>   | <b>N</b>   | <b>3.17</b> |
| <b>water</b>           | <b>103B</b>  | <b>O</b>  | <b>Nh2</b>   | <b>8B</b>   | <b>O</b>   | <b>3.23</b> |
| <b>water</b>           | <b>103B</b>  | <b>O</b>  | <b>Water</b> | <b>102B</b> | <b>O</b>   | <b>2.85</b> |
| <b>Ca<sup>2+</sup></b> | <b>2101A</b> | <b>CA</b> | <b>Asp</b>   | <b>2B</b>   | <b>O</b>   | <b>2.57</b> |
| Ca <sup>2+</sup>       | 2101A        | CA        | Asp          | 2B          | C          | 3.78        |
| <b>Ca<sup>2+</sup></b> | <b>2101A</b> | <b>CA</b> | <b>DNal</b>  | <b>4B</b>   | <b>O</b>   | <b>2.26</b> |
| Ca <sup>2+</sup>       | 2101A        | CA        | DNal         | 4B          | C          | 3.40        |
| Ca <sup>2+</sup>       | 2101A        | CA        | DNal         | 4B          | N          | 3.80        |
