# Supplementary material for: Structures of active melanocortin-4 receptor–Gs-protein complexes with NDP-α-MSH and setmelanotide
Source: PubMed Central journal article supplement (PMC8563958; doi:10.1038/s41422-021-00569-8), 2021-09-24
Supplement: 41422_2021_569_MOESM29_ESM.pdf [file 41422_2021_569_MOESM29_ESM.pdf]

**Table S5: Distances between calcium ion and ligand and MC4R binding partners.**

Interactions between the coordinating calcium ion and its binding partners in the three available models of the MC4R binding the peptides NDP- $\alpha$ -MSH, setmelanotide and SHU9119 were analyzed using CONTACT, a program of the CCP4 software suite <sup>15</sup>. Interactions were calculated between any atoms of the peptide and the receptor, water molecules as well as the calcium ion with a maximum distance of 3.9 Å. Potential hydrogen bonds with a maximum distance of 3.5 Å are highlighted bold. Covalent interactions with Ca<sup>2+</sup> with a maximum distance of 2.4 Å are highlighted bold and red. D-Nal corresponds to (2R)-2-amino-3-(naphthalene-2-YL)propanoic acid abbreviated as 4J2 in the protein database (PDB entry 6w25). At the second position of the SHU9119 peptide there is a homoserine. In the corresponding pdb file (PDB ID: 6w25), this amino acid is abbreviated as Asp B2. D-phenylalanine is abridged as three letter code Dpn.

| Amino acid | Target atoms     |      | NDP- $\alpha$ -MSH<br>(agonist) | Setmelanotide<br>(agonist) | SHU9119<br>(antagonist); (PDB<br>ID: 6w25) |
|------------|------------------|------|---------------------------------|----------------------------|--------------------------------------------|
|            | Number/<br>Chain | Atom | Distance [Å]                    | Distance [Å]               | Distance [Å]                               |
| Glu        | 100A/R           | CD   | -                               | -                          | 3.37                                       |
| Glu        | 100A/R           | OE1  | -                               | -                          | <b>2.21</b>                                |
| Glu        | 100A/R           | OE2  | <b>3.20</b>                     | <b>2.90/3.02</b>           | <b>2.21</b>                                |
| Asp        | 122A/R           | CG   | -                               | -                          | <b>3.27</b>                                |
| Asp        | 122A/R           | OD1  | -                               | -                          | <b>2.27</b>                                |
| Asp        | 122A/R           | OD2  | <b>3.09</b>                     | <b>3.35</b>                | 3.65                                       |
| Asp        | 126A/R           | CG   | 3.50                            | 3.34                       | 3.04                                       |
| Asp        | 126A/R           | OD1  | <b>3.33</b>                     | <b>2.87</b>                | <b>2.64</b>                                |
| Asp        | 126A/R           | OD2  | <b>2.93</b>                     | <b>3.07</b>                | <b>2.73</b>                                |
| Glu        | 5P <sup>-1</sup> | O    | <b>2.68</b>                     | -                          | -                                          |
| Glu        | 5P <sup>-1</sup> | C    | 3.88                            | -                          | -                                          |
| Dpn        | 7P <sup>1</sup>  | O    | <b>2.50</b>                     | -                          | -                                          |
| Dpn        | 7P <sup>1</sup>  | C    | 3.72                            | -                          | -                                          |
| Dpn        | 5P <sup>1</sup>  | O    | -                               | <b>2.64</b>                | -                                          |
| Dpn        | 5P <sup>1</sup>  | C    | -                               | 3.82                       | -                                          |
| His        | 4P <sup>0</sup>  | N    | -                               | <b>3.41</b>                | -                                          |
| His        | 4P <sup>0</sup>  | NE2  | -                               | <b>2.50</b>                | -                                          |
| Arg        | 1P <sup>-3</sup> | NE   | -                               | <b>3.44</b>                | -                                          |
| Asp        | 2B <sup>-1</sup> | O    | -                               | -                          | <b>2.57</b>                                |
| Asp        | 2B <sup>-1</sup> | C    | -                               | -                          | 3.78                                       |
| DNal       | 4B <sup>1</sup>  | O    | -                               | -                          | <b>2.26</b>                                |
| DNal       | 4B <sup>1</sup>  | C    | -                               | -                          | 3.40                                       |
| DNal       | 4B <sup>1</sup>  | N    | -                               | -                          | 3.80                                       |
