# Supplementary material for: Structures of active melanocortin-4 receptor–Gs-protein complexes with NDP-α-MSH and setmelanotide
Source: PubMed Central journal article supplement (PMC8563958; doi:10.1038/s41422-021-00569-8), 2021-09-24
Supplement: 41422_2021_569_MOESM30_ESM.pdf [file 41422_2021_569_MOESM30_ESM.pdf]

**Table S6: Comparison of the receptor-ligand contacts in complexes of MC4R with the agonists NDP- $\alpha$ -MSH and setmelanotide as well as the antagonist SHU9119.** Interactions of all relevant amino acids of the MC4R the calcium ion ( $\text{Ca}^{2+}$ ) and water molecules within the ligand binding pocket towards the binding peptides NDP- $\alpha$ -MSH, setmelanotide and SHU9119 were summarized based on the Tables S2-4. Amino acids were abbreviated as one letter code, capital numbers display the position within the receptor or peptide (in the pdb file), and superscripted numbering refers to the conserved *HxRW* motif of the binding peptides. D-Nal corresponds to (2R)-2-amino-3-(naphthalene-2-YL)propanoic acid abbreviated as 4J2 in the protein database (PDB ID: 6w25). D-phenylalanine, D-alanine and norleucine are abridged as three letter code Dpn, Dal and Nle, respectively.

| MC4R                                       | NDP- $\alpha$ -MSH<br>(agonist); (PDB ID: 7PIV,<br>this study)          | Setmelanotide<br>(agonist); (PDB ID: 7PIU,<br>this study)                   | SHU9119<br>(antagonist); (PDB ID: 6w25)                                  |
|--------------------------------------------|-------------------------------------------------------------------------|-----------------------------------------------------------------------------|--------------------------------------------------------------------------|
| F51                                        | H6 <sup>0</sup>                                                         | H4 <sup>0</sup>                                                             | -                                                                        |
| N97<br>(L97 -<br>antagonized<br>structure) | -                                                                       | -                                                                           | Dnal4 <sup>1</sup>                                                       |
| E100                                       | Nle4 <sup>-2</sup> , E5 <sup>-1</sup>                                   | A: Dpn5 <sup>1</sup><br>B: Dal3 <sup>-1</sup>                               | H3 <sup>0</sup> , Dnal4 <sup>1</sup> , D2 <sup>-1</sup>                  |
| T101                                       | H6 <sup>0</sup>                                                         | H4 <sup>0</sup>                                                             | H3 <sup>0</sup>                                                          |
| V103                                       | -                                                                       | -                                                                           | Nle1 <sup>-2</sup>                                                       |
| I104                                       | Nle4 <sup>-2</sup>                                                      | Dal3 <sup>-1</sup>                                                          | Nle1 <sup>-2</sup> , D2 <sup>-1</sup> , H3 <sup>0</sup>                  |
| T118                                       | -                                                                       | -                                                                           | Nle1 <sup>-2</sup>                                                       |
| D122                                       | Nle4 <sup>-2</sup>                                                      | R1 <sup>-3</sup> , R6 <sup>2</sup>                                          | Nle1 <sup>-2</sup> , D2 <sup>-1</sup> , R5 <sup>2</sup>                  |
| N123                                       | -                                                                       | R6 <sup>2</sup>                                                             | R5 <sup>2</sup>                                                          |
| D126                                       | Dpn7 <sup>1</sup> , R8 <sup>2</sup>                                     | Dpn5 <sup>1</sup> , Arg6 <sup>2</sup>                                       | Dnal4 <sup>1</sup> , Arg5 <sup>2</sup>                                   |
| I129                                       | Dpn7 <sup>1</sup>                                                       | Dpn5 <sup>1</sup>                                                           | Dnal4 <sup>1</sup>                                                       |
| C130                                       | -                                                                       | -                                                                           | Dnal4 <sup>1</sup>                                                       |
| L133*                                      | -                                                                       | Dpn5 <sup>1</sup>                                                           | Dnal4 <sup>1</sup>                                                       |
| I185*                                      | R8 <sup>2</sup>                                                         | -                                                                           | Dnal4 <sup>1</sup> , R5 <sup>2</sup>                                     |
| S188                                       | R8 <sup>2</sup> , W9 <sup>3</sup>                                       | R6 <sup>2</sup> , W7 <sup>3</sup>                                           | R5 <sup>2</sup> , W6 <sup>3</sup>                                        |
| V193                                       | W9 <sup>3</sup>                                                         | -                                                                           | -                                                                        |
| I194                                       | W9 <sup>3</sup>                                                         | W7 <sup>3</sup>                                                             | W6 <sup>3</sup>                                                          |
| L197                                       | W9 <sup>3</sup>                                                         | W7 <sup>3</sup>                                                             | Dnal4 <sup>1</sup> , W6 <sup>3</sup>                                     |
| F261                                       | -                                                                       | Dpn5 <sup>1</sup>                                                           | Dnal4 <sup>1</sup>                                                       |
| H264                                       | W9 <sup>3</sup> , G10 <sup>4</sup>                                      | W7 <sup>3</sup> , C8 <sup>4</sup>                                           | W6 <sup>3</sup> , K7 <sup>4</sup> , NH <sub>2</sub> 8 <sup>5</sup>       |
| L265                                       | -                                                                       | -                                                                           | W6 <sup>3</sup>                                                          |
| Y268                                       | W9 <sup>3</sup> , K11 <sup>5</sup> , P12 <sup>6</sup>                   | W7 <sup>3</sup>                                                             | W6 <sup>3</sup> , K7 <sup>4</sup>                                        |
| M281                                       | -                                                                       | -                                                                           | NH <sub>2</sub> 8 <sup>5</sup>                                           |
| F284                                       | H6 <sup>0</sup> , R8 <sup>2</sup> , G10 <sup>4</sup>                    | H4 <sup>0</sup> , R6 <sup>2</sup> , C8 <sup>4</sup>                         | H3 <sup>0</sup> , R5 <sup>2</sup> , K7 <sup>4</sup>                      |
| N285                                       | -                                                                       | H4 <sup>0</sup>                                                             | -                                                                        |
| L288                                       | H6 <sup>0</sup> , Dpn7 <sup>1</sup>                                     | H4 <sup>0</sup>                                                             | H3 <sup>0</sup> , Dnal4 <sup>1</sup>                                     |
| <b>Ca<sup>2+</sup></b>                     | MC4R: E100, D122, D126;<br>Ligand: E5 <sup>-1</sup> , Dpn7 <sup>1</sup> | MC4R: E100, D122, D126;<br>Ligand: Dpn5 <sup>1</sup>                        | MC4R: E100, D122, D126;<br>Ligand: D2 <sup>-1</sup> , Dnal4 <sup>1</sup> |
| water 30                                   | -                                                                       | Dal3 <sup>-1</sup> , H4 <sup>0</sup> , C8 <sup>4</sup> , Q43, F284,<br>N285 | -                                                                        |
| water 43                                   | Nle4 <sup>-2</sup>                                                      | -                                                                           | -                                                                        |

|           |   |                                    |                                                                                                     |
|-----------|---|------------------------------------|-----------------------------------------------------------------------------------------------------|
| water 63  | - | R1 <sup>-3</sup> , R6 <sup>2</sup> | -                                                                                                   |
| water 101 | - | -                                  | D2 <sup>-1</sup> , H3 <sup>0</sup> , K7 <sup>4</sup> ,                                              |
| water 102 | - | -                                  | R5 <sup>2</sup> , W6 <sup>3</sup> , Y268, water 103,<br>water 104                                   |
| water 103 | - | -                                  | W6 <sup>3</sup> , K7 <sup>4</sup> , Y268, water102,<br>water 105                                    |
| water 104 | - | -                                  | Dna14 <sup>-1</sup> , R5 <sup>2</sup> , W6 <sup>3</sup> , K7 <sup>4</sup> , water<br>102, water 105 |
| water 105 | - | -                                  | D2 <sup>-1</sup> , K7 <sup>4</sup> , water 103, water<br>104                                        |
