# Supplementary material for: Structures of active melanocortin-4 receptor–Gs-protein complexes with NDP-α-MSH and setmelanotide
Source: PubMed Central journal article supplement (PMC8563958; doi:10.1038/s41422-021-00569-8), 2021-09-24
Supplement: 41422_2021_569_MOESM31_ESM.pdf [file 41422_2021_569_MOESM31_ESM.pdf]

**Table S7: Determination of total and cell surface expression with Nano-Glo®HiBiT Lytic/Extracellular detection system, and maximal cAMP response  $E_{max}$  via AlphaScreen®.** Data are given as the result of four to eight independent experiments performed in triplicates  $\pm$  SEM. Wild-type MC4R (WT) stimulation as fold over MC4R basal for all assays is  $20 \pm 1.06$  fold for  $\alpha$ -MSH,  $22 \pm 1.15$  fold for NDP- $\alpha$ -MSH and  $14.53 \pm 1.53$  for setmelanotide, all set as 100 %. Expression data were cleaned by performing a ROUT test with  $Q = 1\%$ . Statistics were done by one-way ANOVA with Kruskal-Wallis test. WT was tested against all mutants stimulated with the indicated ligand: a:  $p < 0.05$ ; b:  $p < 0.01$ ; c:  $p < 0.001$ ; d:  $p < 0.0001$ .

| Substitution | Total expression [fold over WT basal] | Cell surface expression [fold over WT basal] | Basal [fold over WT basal]   | $\alpha$ -MSH $E_{max}$ [% of WT at 1 $\mu$ M] | NDP- $\alpha$ -MSH $E_{max}$ [% of WT at 1 $\mu$ M] | Set-melanotide $E_{max}$ [% of WT at 1 $\mu$ M] |
|--------------|---------------------------------------|----------------------------------------------|------------------------------|------------------------------------------------|-----------------------------------------------------|-------------------------------------------------|
| MC4R WT      | 1                                     | 1                                            | 1                            | 100                                            | 100                                                 | 100                                             |
| E100N        | 1.30 $\pm$ 0.10                       | 2.42 $\pm$ 0.15 <sup>d</sup>                 | 0.98 $\pm$ 0.08              | 11.35 $\pm$ 1.45 <sup>a</sup>                  | 56.10 $\pm$ 4.13 <sup>a</sup>                       | 103 $\pm$ 13                                    |
| T101A        | 1.41 $\pm$ 0.07                       | 0.89 $\pm$ 0.11                              | 1.16 $\pm$ 0.16 <sup>a</sup> | 189 $\pm$ 10 <sup>d</sup>                      | 155 $\pm$ 12 <sup>b</sup>                           | -                                               |
| D122S        | 1.63 $\pm$ 0.06 <sup>c</sup>          | 1.41 $\pm$ 0.09                              | 1.16 $\pm$ 0.06              | 40.10 $\pm$ 3.46                               | 129 $\pm$ 8.56                                      | 138 $\pm$ 11                                    |
| N123A        | 0.53 $\pm$ 0.03 <sup>d</sup>          | 0.60 $\pm$ 0.05 <sup>c</sup>                 | 1.05 $\pm$ 0.05              | 163 $\pm$ 13 <sup>b</sup>                      | 119 $\pm$ 7.89                                      | 154 $\pm$ 11 <sup>b</sup>                       |
| D126S        | 1.28 $\pm$ 0.07                       | 1.87 $\pm$ 0.14 <sup>c</sup>                 | 0.90 $\pm$ 0.05 <sup>a</sup> | 13.92 $\pm$ 1.67 <sup>a</sup>                  | 91.23 $\pm$ 7.74                                    | 81.69 $\pm$ 7.77                                |
| C130A        | 0.99 $\pm$ 0.04                       | 1.13 $\pm$ 0.09                              | 1.03 $\pm$ 0.09              | 147 $\pm$ 9.24 <sup>a</sup>                    | 114 $\pm$ 9.25                                      | -                                               |
| L133A        | 1.11 $\pm$ 0.10                       | 0.78 $\pm$ 0.15                              | 1.03 $\pm$ 0.05              | 130 $\pm$ 6                                    | 152 $\pm$ 8 <sup>a</sup>                            | -                                               |
| L133F        | 0.97 $\pm$ 0.09                       | 1.34 $\pm$ 0.11                              | 0.85 $\pm$ 0.04 <sup>a</sup> | 112 $\pm$ 6                                    | 137 $\pm$ 7                                         | -                                               |
| I137A        | 0.83 $\pm$ 0.04                       | 0.79 $\pm$ 0.03                              | 1.30 $\pm$ 0.08              | 92.78 $\pm$ 4.96                               | 99.40 $\pm$ 4.89                                    | -                                               |
| I137F        | 0.81 $\pm$ 0.07                       | 0.57 $\pm$ 0.06 <sup>b</sup>                 | 1.02 $\pm$ 0.06              | 76.65 $\pm$ 3.93                               | 94.21 $\pm$ 5.53                                    | -                                               |
| T150A        | 0.60 $\pm$ 0.06 <sup>c</sup>          | 0.58 $\pm$ 0.04 <sup>b</sup>                 | 0.76 $\pm$ 0.06 <sup>d</sup> | 26.11. $\pm$ 1.64 <sup>d</sup>                 | 18.07 $\pm$ 2.17 <sup>d</sup>                       | 32.41 $\pm$ 1.87 <sup>d</sup>                   |
| T150I        | 0.69 $\pm$ 0.06 <sup>a</sup>          | 0.55 $\pm$ 0.02 <sup>b</sup>                 | 0.88 $\pm$ 0.06 <sup>c</sup> | 36.46 $\pm$ 2.24 <sup>d</sup>                  | 40.74 $\pm$ 2.08 <sup>d</sup>                       | -                                               |
| T150D        | 0.41 $\pm$ 0.03 <sup>d</sup>          | 0.47 $\pm$ 0.03 <sup>c</sup>                 | 0.85 $\pm$ 0.05              | 9.88 $\pm$ 0.91 <sup>d</sup>                   | 10.85 $\pm$ 0.86 <sup>c</sup>                       | -                                               |
| T150F        | 1.09 $\pm$ 0.05                       | 0.88 $\pm$ 0.03                              | 0.83 $\pm$ 0.02 <sup>a</sup> | 42.60 $\pm$ 2.41 <sup>d</sup>                  | 55.68 $\pm$ 4.64 <sup>a</sup>                       | -                                               |
| T150S        | 1.44 $\pm$ 0.09                       | 1.23 $\pm$ 0.05                              | 0.77 $\pm$ 0.03 <sup>c</sup> | 77.81 $\pm$ 5.11 <sup>a</sup>                  | 86.18 $\pm$ 5.14                                    | -                                               |
| H158A        | 1.35 $\pm$ 0.17                       | 1.37 $\pm$ 0.16                              | 2.49 $\pm$ 0.19 <sup>d</sup> | 129 $\pm$ 15                                   | 129 $\pm$ 15                                        | 148 $\pm$ 17 <sup>b</sup>                       |
| F184V        | 1.14 $\pm$ 0.07                       | 1.82 $\pm$ 0.14 <sup>c</sup>                 | 1.24 $\pm$ 0.11              | 149 $\pm$ 14                                   | 91.65 $\pm$ 8.29                                    | -                                               |
| S188A        | 1.10 $\pm$ 0.13                       | 1.15 $\pm$ 0.06                              | 0.94 $\pm$ 0.07              | 148 $\pm$ 11 <sup>a</sup>                      | 142 $\pm$ 15                                        | -                                               |
| D189S        | 0.98 $\pm$ 0.06                       | 1.51 $\pm$ 0.13                              | 0.80 $\pm$ 0.06              | 151 $\pm$ 16                                   | 166 $\pm$ 28                                        | -                                               |
| S191A        | 1.00 $\pm$ 0.06                       | 0.89 $\pm$ 0.04                              | 1.00 $\pm$ 0.04              | 199 $\pm$ 18 <sup>c</sup>                      | 197 $\pm$ 22 <sup>c</sup>                           | -                                               |
| L197A        | 0.78 $\pm$ 0.06                       | 1.12 $\pm$ 0.16                              | 0.84 $\pm$ 0.05              | 152 $\pm$ 11                                   | 171 $\pm$ 24 <sup>a</sup>                           | -                                               |
| M204A        | 0.60 $\pm$ 0.04 <sup>c</sup>          | 0.69 $\pm$ 0.04                              | 1.81 $\pm$ 0.13 <sup>d</sup> | 113 $\pm$ 5                                    | 103 $\pm$ 5                                         | -                                               |
| L205A        | 0.92 $\pm$ 0.06                       | 0.82 $\pm$ 0.08                              | 1.21 $\pm$ 0.06              | 101 $\pm$ 7                                    | 99.85 $\pm$ 5.61                                    | -                                               |
| L205F        | 1.14 $\pm$ 0.05                       | 1.02 $\pm$ 0.04                              | 2.32 $\pm$ 0.20 <sup>d</sup> | 112 $\pm$ 6                                    | 112 $\pm$ 6                                         | -                                               |
| F254A        | 1.73 $\pm$ 0.15 <sup>a</sup>          | 0.94 $\pm$ 0.04                              | 1.02 $\pm$ 0.03              | 88.67 $\pm$ 5.41                               | 85.09 $\pm$ 5.23                                    | -                                               |
| F254M        | 1.99 $\pm$ 0.17 <sup>b</sup>          | 1.57 $\pm$ 0.10 <sup>a</sup>                 | 0.99 $\pm$ 0.04              | 77.33 $\pm$ 8.14                               | 97.12 $\pm$ 10.32                                   | -                                               |
| W258A        | 0.73 $\pm$ 0.07                       | 0.48 $\pm$ 0.04 <sup>c</sup>                 | 0.94 $\pm$ 0.07              | 61.40 $\pm$ 4.13 <sup>d</sup>                  | 65.04 $\pm$ 5.30 <sup>b</sup>                       | -                                               |
| W258F        | 1.30 $\pm$ 0.09                       | 0.96 $\pm$ 0.06                              | 2.48 $\pm$ 0.22 <sup>d</sup> | 78.13 $\pm$ 4.39 <sup>a</sup>                  | 72.66 $\pm$ 4.83                                    | -                                               |
| F261V        | 0.81 $\pm$ 0.04                       | 0.77 $\pm$ 0.10                              | 0.93 $\pm$ 0.08              | 63.54 $\pm$ 4.19                               | 61.61 $\pm$ 5.96                                    | 112 $\pm$ 8                                     |
| H264A        | 0.47 $\pm$ 0.04 <sup>d</sup>          | 1.35 $\pm$ 0.05                              | 1.10 $\pm$ 0.07              | 10.21 $\pm$ 0.94 <sup>a</sup>                  | 133 $\pm$ 9.10                                      | 111 $\pm$ 10                                    |
| L265A        | 0.62 $\pm$ 0.04 <sup>d</sup>          | 0.78 $\pm$ 0.05                              | 0.89 $\pm$ 0.08              | 83.68 $\pm$ 6.16                               | 140 $\pm$ 12                                        | -                                               |
| Y268F        | 0.98 $\pm$ 0.07                       | 1.06 $\pm$ 0.06                              | 0.87 $\pm$ 0.03              | 140 $\pm$ 16                                   | 133 $\pm$ 14                                        | -                                               |
| H283A        | 0.95 $\pm$ 0.07                       | 1.17 $\pm$ 0.08                              | 1.40 $\pm$ 0.18              | 164 $\pm$ 15 <sup>a</sup>                      | 152 $\pm$ 21                                        | -                                               |
| F284V        | 0.67 $\pm$ 0.09 <sup>b</sup>          | 0.90 $\pm$ 0.05                              | 1.08 $\pm$ 0.03              | 145 $\pm$ 14                                   | 165 $\pm$ 27                                        | -                                               |

|       |                   |                   |                 |                    |                   |   |
|-------|-------------------|-------------------|-----------------|--------------------|-------------------|---|
| N285S | $0.86 \pm 0.07$   | $0.99 \pm 0.07$   | $1.14 \pm 0.05$ | $173 \pm 16^a$     | $167 \pm 22$      | - |
| Y287V | $0.74 \pm 0.02$   | $1.75 \pm 0.10^b$ | $0.99 \pm 0.04$ | $148 \pm 12$       | $142 \pm 18$      | - |
| L288A | $0.51 \pm 0.04^d$ | $0.47 \pm 0.05^d$ | $0.94 \pm 0.04$ | $76.41 \pm 5.51$   | $129 \pm 12$      | - |
| I291A | $0.49 \pm 0.03^d$ | $0.54 \pm 0.05^b$ | $0.94 \pm 0.03$ | $11.09 \pm 0.94^d$ | $8.98 \pm 0.69^d$ | - |
| I291F | $0.81 \pm 0.08$   | $0.54 \pm 0.04^c$ | $0.92 \pm 0.05$ | $79.83 \pm 6.47$   | $71.34 \pm 6.02$  | - |
