# Supplementary material for: Structures of active melanocortin-4 receptor–Gs-protein complexes with NDP-α-MSH and setmelanotide
Source: PubMed Central journal article supplement (PMC8563958; doi:10.1038/s41422-021-00569-8), 2021-09-24
Supplement: 41422_2021_569_MOESM32_ESM.pdf [file 41422_2021_569_MOESM32_ESM.pdf]

**Table S8: Determination of half maximal effective concentration  $EC_{50}$  via cAMP accumulation using the AlphaScreen® assay after addition of agonists  $\alpha$ -MSH, NDP- $\alpha$ -MSH and setmelanotide.** Data are given as the result of four to eight independent experiments performed in triplicates  $\pm$  SEM. Statistics were done by one-way ANOVA with Kruskal-Wallis test. Wild-type MC4R (WT) was tested against all mutants stimulated with the indicated ligand. a:  $p < 0.05$ ; b:  $p < 0.01$ ; c:  $p < 0.001$ ; d:  $p < 0.0001$ ; n.d. = not determined due to either too low  $E_{max}$  or due to severely shifted concentration-response curve which do not allow proper  $EC_{50}$  calculation.

| <b>Substitution</b> | <b><math>\alpha</math>-MSH<br/><math>EC_{50}</math> [nM]</b> | <b>NDP-<math>\alpha</math>-MSH<br/><math>EC_{50}</math> [nM]</b> | <b>Setmelanotide<br/><math>EC_{50}</math> [nM]</b> |
|---------------------|--------------------------------------------------------------|------------------------------------------------------------------|----------------------------------------------------|
| MC4R<br>WT          | 17.6 $\pm$ 4.21                                              | 1.17 $\pm$ 0.26                                                  | 1.24 $\pm$ 0.39                                    |
| E100N               | n.d.                                                         | 383 $\pm$ 139 <sup>c</sup>                                       | n.d.                                               |
| T101A               | 49.4 $\pm$ 6.12                                              | 0.9 $\pm$ 0.05                                                   | -                                                  |
| D122S               | n.d.                                                         | 9.74 $\pm$ 1.61 <sup>b</sup>                                     | n.d.                                               |
| N123A               | 33.3 $\pm$ 5.97                                              | 0.93 $\pm$ 0.23                                                  | 6.40 $\pm$ 2.82                                    |
| D126S               | n.d.                                                         | 166 $\pm$ 34.2 <sup>c</sup>                                      | n.d.                                               |
| C130A               | 136 $\pm$ 21.9 <sup>c</sup>                                  | 2.20 $\pm$ 0.71                                                  | -                                                  |
| L133A               | 94.7 $\pm$ 1.58                                              | 2.07 $\pm$ 0.26                                                  | -                                                  |
| L133F               | 76.1 $\pm$ 17.0                                              | 3.79 $\pm$ 0.77                                                  | -                                                  |
| I137A               | 19.7 $\pm$ 5.97                                              | 1.15 $\pm$ 0.08                                                  | -                                                  |
| T150A               | n.d.                                                         | n.d.                                                             | 1.09 $\pm$ 0.08                                    |
| T150I               | 86.2 $\pm$ 34.9                                              | 1.41 $\pm$ 0.35                                                  | -                                                  |
| T150F               | 91.9 $\pm$ 16.9                                              | 2.06 $\pm$ 0.58                                                  | -                                                  |
| T150S               | 36.2 $\pm$ 9.10                                              | 0.76 $\pm$ 0.16                                                  | -                                                  |
| H158A               | 7.59 $\pm$ 3.83                                              | 0.58 $\pm$ 0.14                                                  | 2.4 $\pm$ 0.82                                     |
| S188A               | 101 $\pm$ 30.2                                               | 0.97 $\pm$ 0.19                                                  | -                                                  |
| M204A               | 6.34 $\pm$ 1.17                                              | 1.06 $\pm$ 0.44                                                  | -                                                  |
| L205F               | 7.18 $\pm$ 1.84                                              | 1.38 $\pm$ 0.45                                                  | -                                                  |
| W258A               | 70.7 $\pm$ 17.7                                              | 2.53 $\pm$ 0.34                                                  | -                                                  |
| W258F               | 2.60 $\pm$ 0.53                                              | 0.59 $\pm$ 0.2                                                   | -                                                  |
| F261V               | 118 $\pm$ 14.5 <sup>c</sup>                                  | 2.96 $\pm$ 1.44                                                  | 28.80 $\pm$ 7.70                                   |
| H264A               | n.d.                                                         | 179 $\pm$ 32.5 <sup>d</sup>                                      | n.d.                                               |
