# Supplementary material for: Structures of active melanocortin-4 receptor–Gs-protein complexes with NDP-α-MSH and setmelanotide
Source: PubMed Central journal article supplement (PMC8563958; doi:10.1038/s41422-021-00569-8), 2021-09-24
Supplement: 41422_2021_569_MOESM33_ESM.pdf [file 41422_2021_569_MOESM33_ESM.pdf]

**Table S9: Determination of Gq/11 activation by determination of phospholipase C activation via NFAT reporter gene assay.** Data are given as the result of four to six independent experiments performed in triplicated  $\pm$  SEM. The stimulation of wild-type MC4R (WT) as fold over WT basal is  $7.56 \pm 0.87$  for NDP- $\alpha$ -MSH challenge and  $10.91 \pm 0.88$  for stimulation with setmelanotide at a concentration of 1  $\mu$ M. Statistics were done by one-way ANOVA with Kruskal-Wallis test. MC4R WT was tested against all mutants stimulated with the indicated ligand: a:  $p < 0.05$ ; b:  $p < 0.01$ ; c:  $p < 0.001$ ; d:  $p < 0.0001$ ; n.d. = not determined due to either too low  $E_{max}$  or due to severely shifted concentration-response curve which do not allow proper  $EC_{50}$  calculation.

| Variant | Basal                     | NDP- $\alpha$ -MSH                                    |                  | Setmelanotide                                         |                  |
|---------|---------------------------|-------------------------------------------------------|------------------|-------------------------------------------------------|------------------|
|         | [fold over MC4R WT basal] | $E_{max}$ at 1 $\mu$ M [fold of MC4R WT at 1 $\mu$ M] | $EC_{50}$ [nM]   | $E_{max}$ at 1 $\mu$ M [fold of MC4R WT at 1 $\mu$ M] | $EC_{50}$ [nM]   |
| MC4R WT | 1                         | 100                                                   | $5.81 \pm 0.88$  | 100                                                   | $6.29 \pm 0.76$  |
| E100N   | $1.17 \pm 0.21$           | $22.94 \pm 3.20^c$                                    | n.d.             | $46.72 \pm 10.23^a$                                   | n.d.             |
| D122S   | $1.07 \pm 0.18$           | $194 \pm 17$                                          | $85.5 \pm 12.4$  | $132 \pm 37$                                          | $401 \pm 59.6^a$ |
| D126S   | $0.97 \pm 0.09$           | $30.53 \pm 4.33^b$                                    | n.d.             | $25.72 \pm 6.94^d$                                    | n.d.             |
| T150A   | $0.73 \pm 0.08^b$         | $129 \pm 14$                                          | $11.7 \pm 1.98$  | $126.75 \pm 13.19$                                    | $92.1 \pm 24.7$  |
| H158A   | $1.01 \pm 0.15$           | $51.66 \pm 9.35$                                      | $10.00 \pm 4.47$ | $57.45 \pm 7.56^a$                                    | $20.6 \pm 6.58$  |
