# Supplementary material for: Structures of active melanocortin-4 receptor–Gs-protein complexes with NDP-α-MSH and setmelanotide
Source: PubMed Central journal article supplement (PMC8563958; doi:10.1038/s41422-021-00569-8), 2021-09-24
Supplement: 41422_2021_569_MOESM34_ESM.pdf [file 41422_2021_569_MOESM34_ESM.pdf]

**Table S10: Binding affinities and  $EC_{50}$  values of diverse melanocortin ligands.** Data were extracted from previous studies and combined with data (\*) measured in this study.

| <b>ligand</b>    | <b><math>\alpha</math>-MSH<br/>[nM]</b> | <b><math>\beta</math>-MSH<br/>[nM]</b> | <b>NDP-<math>\alpha</math>-<br/>MSH<br/>[nM]</b> | <b>Setmelanotide<br/>[nM]</b> | <b>LY2112688<br/>[nM]</b> |
|------------------|-----------------------------------------|----------------------------------------|--------------------------------------------------|-------------------------------|---------------------------|
| $K_i$ or $K_D$   | 51 <sup>3</sup>                         | 20 <sup>16</sup>                       | 1 <sup>3</sup> /1*                               | 2.1 <sup>17</sup> /1*         | 4 <sup>18</sup>           |
| $EC_{50}$ (cAMP) | 18*                                     | 33 <sup>19</sup>                       | 1*                                               | 1*                            | 14 <sup>20</sup>          |
| $EC_{50}$ (NFAT) | 489 <sup>19</sup> ; 174 <sup>20</sup>   | 107 <sup>19</sup>                      | 6*                                               | 6*                            | 330 <sup>20</sup>         |
